# Supplementary material
Source: PubMed Central journal article supplement (PMC5739004)

## Figure S5.A. Contig 1

### *dnaE* (beta)

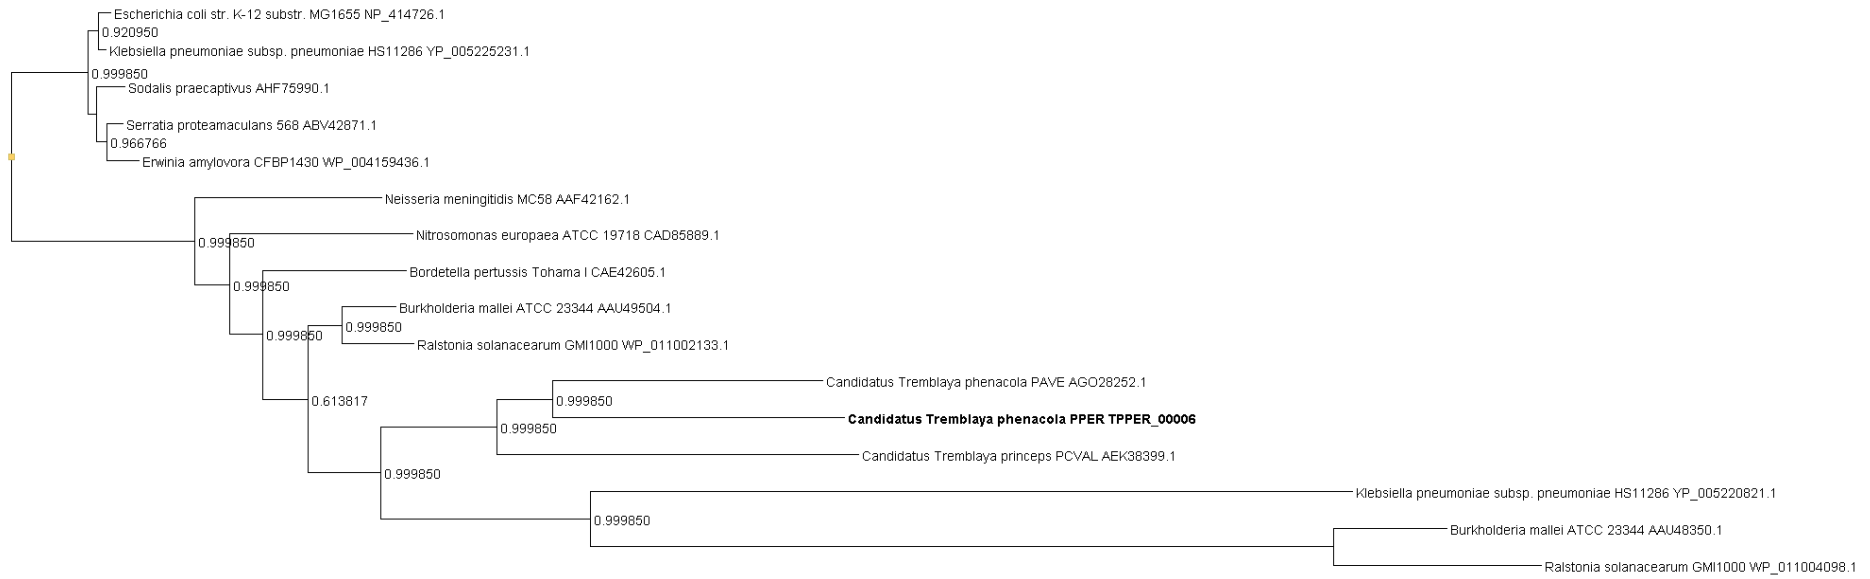

### *cysS* (gamma)

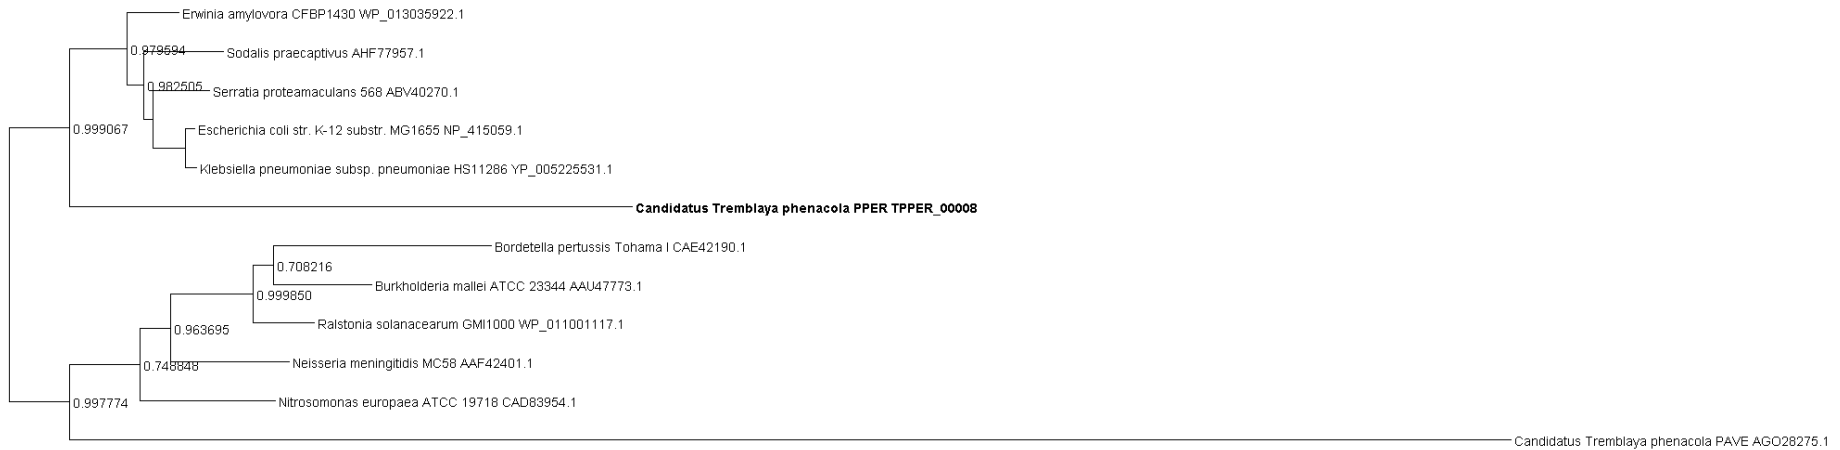

## Figure S5.B. Contig 2

### *dnaN* (beta)

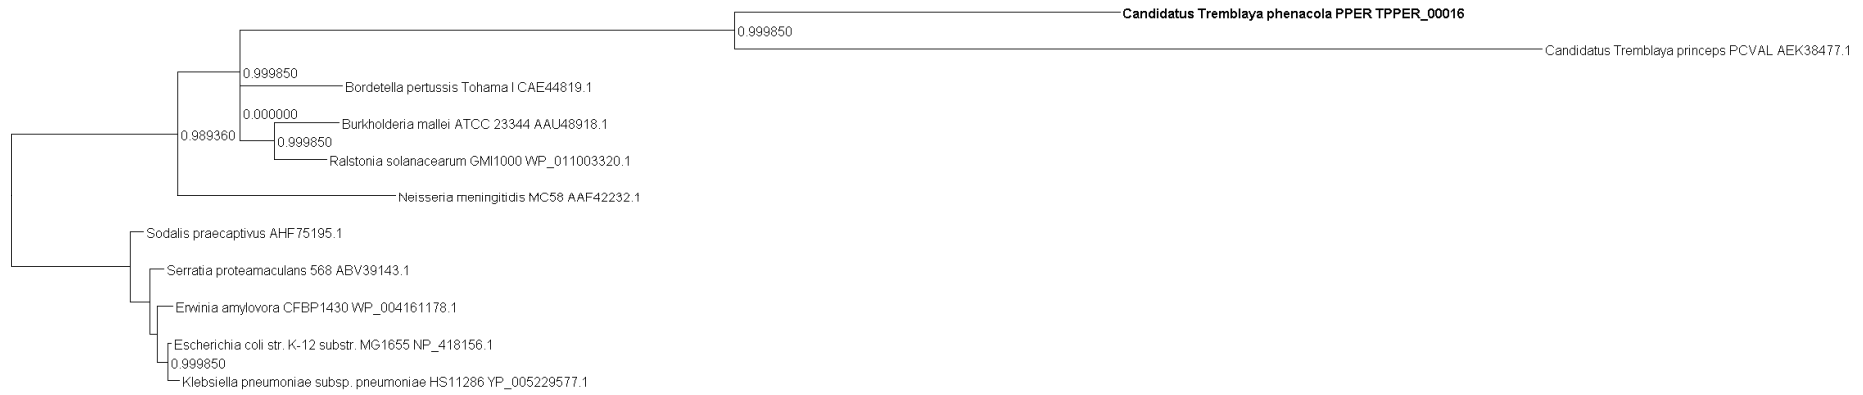

### *rpoD* (beta only by Phylomizer)

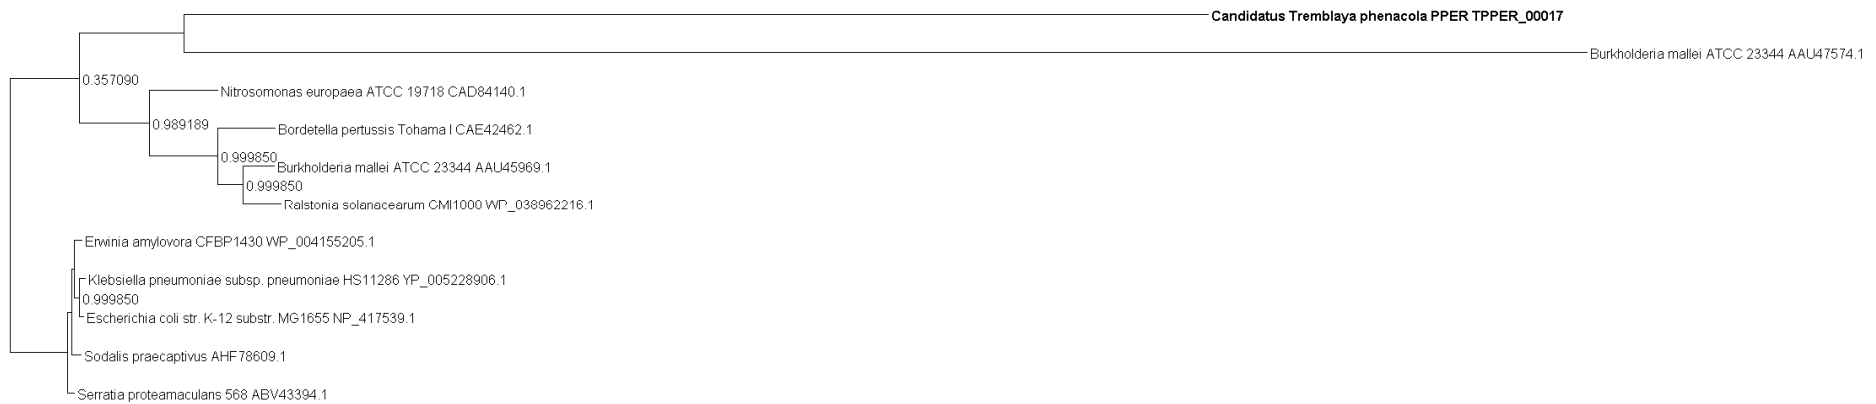

*tiS* (gamma)

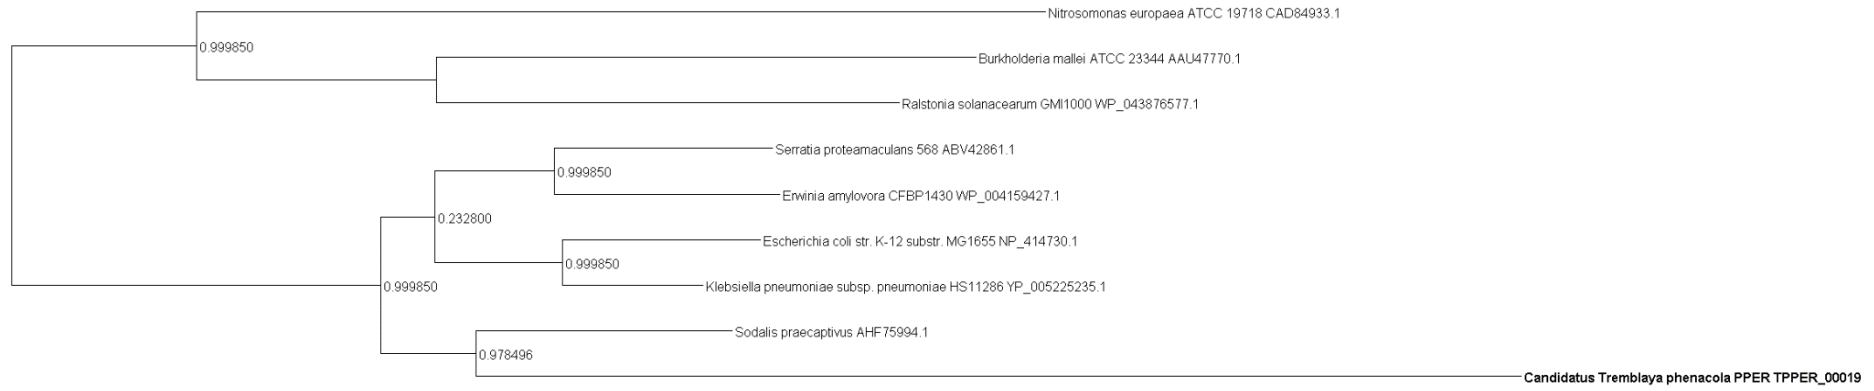

## Figure S5.C. Contig 3

### *rsmH* (gamma)

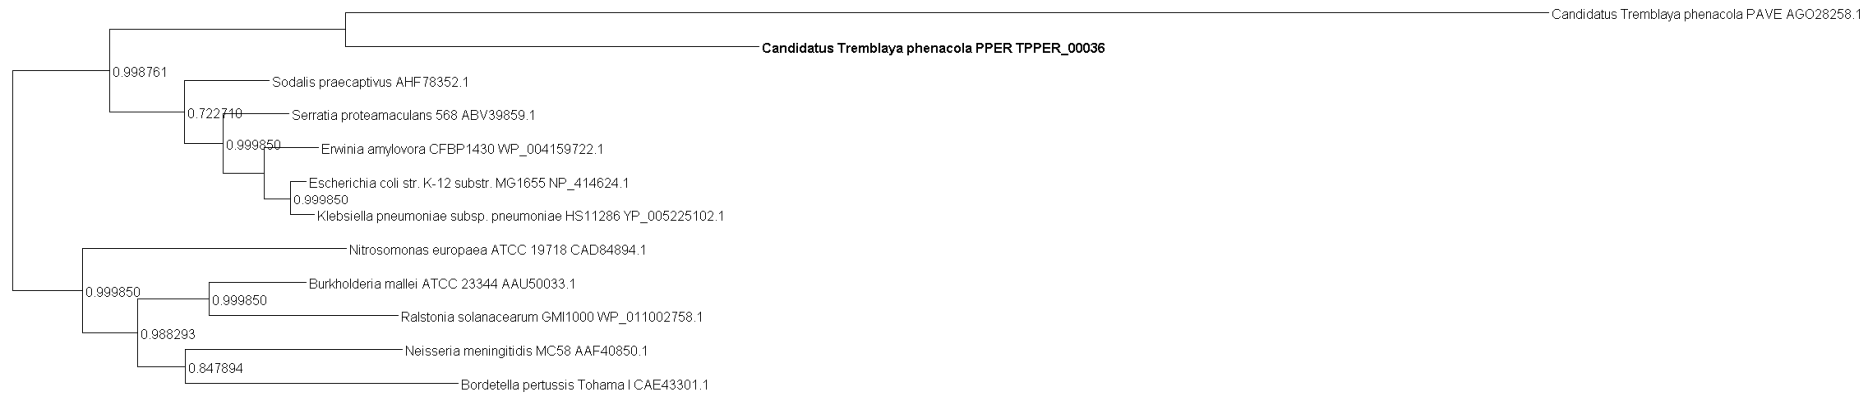

### *lon* (beta)

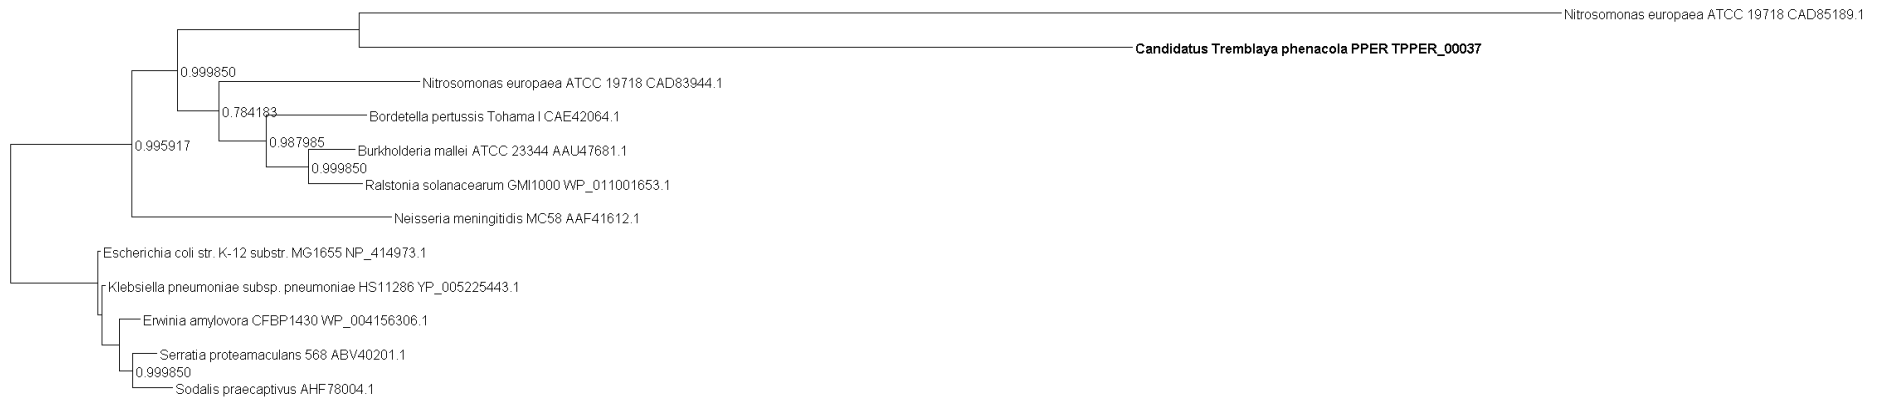

## Figure S5.D. Contig 7

### *der* (beta)

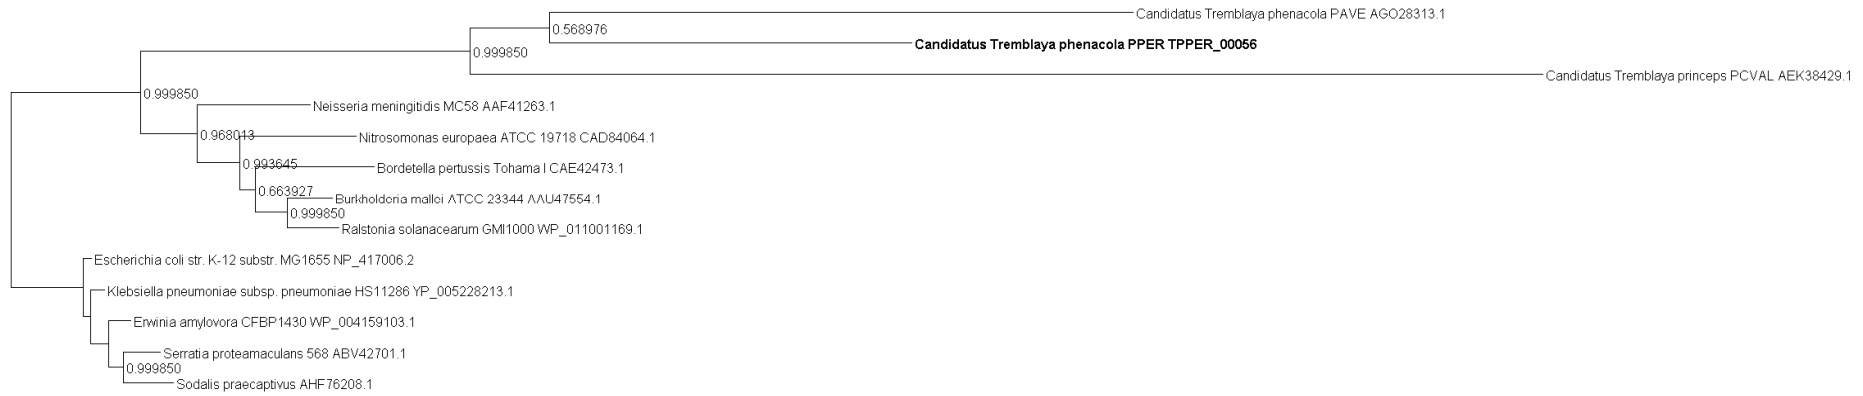

### *ribE* (gamma)

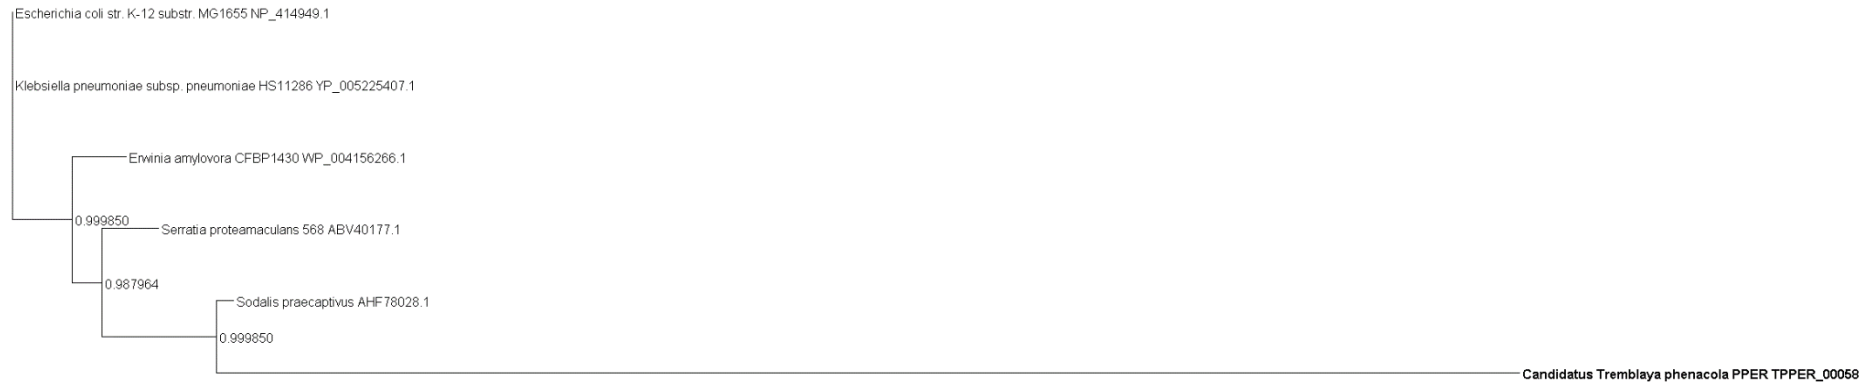

## obg (gamma)

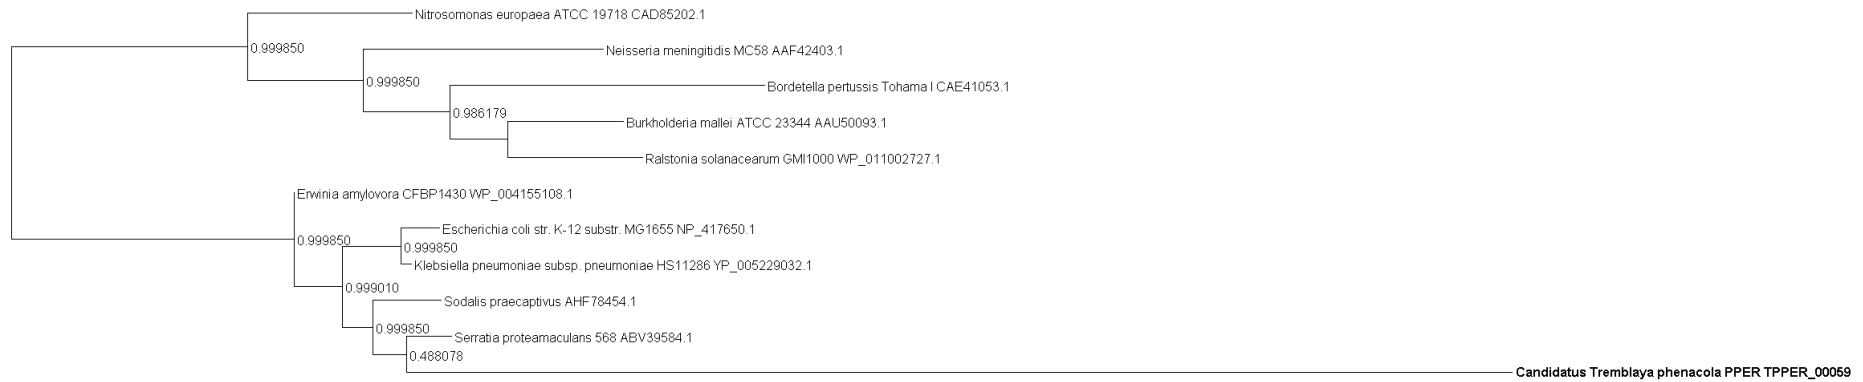

## sspB (beta)

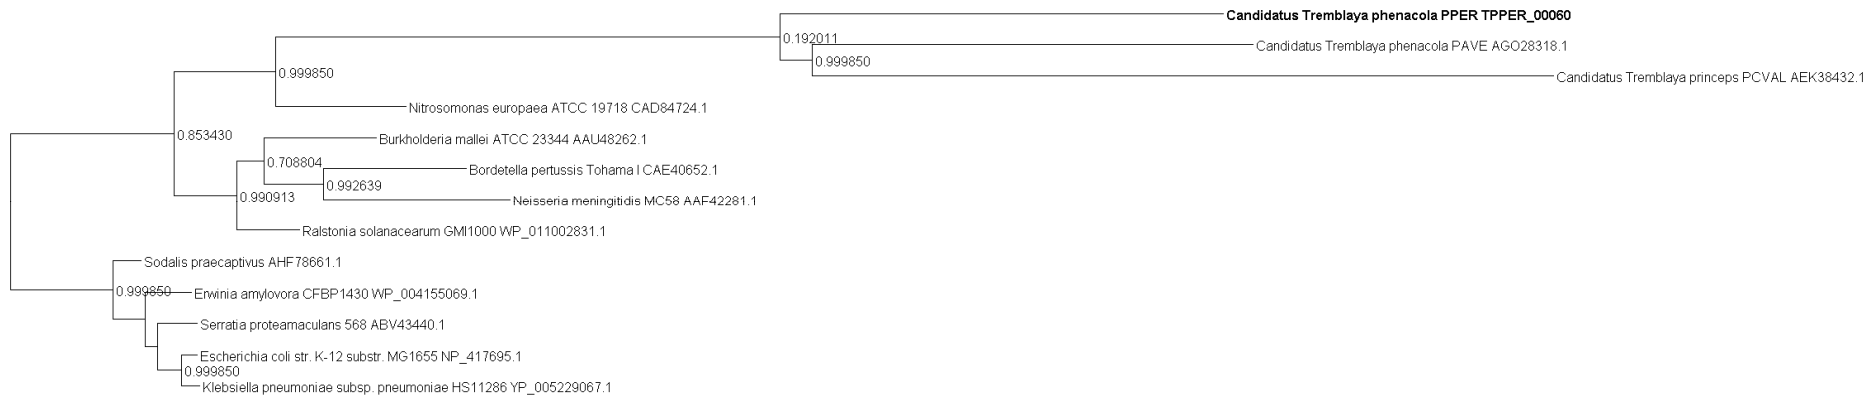

## tal (beta)

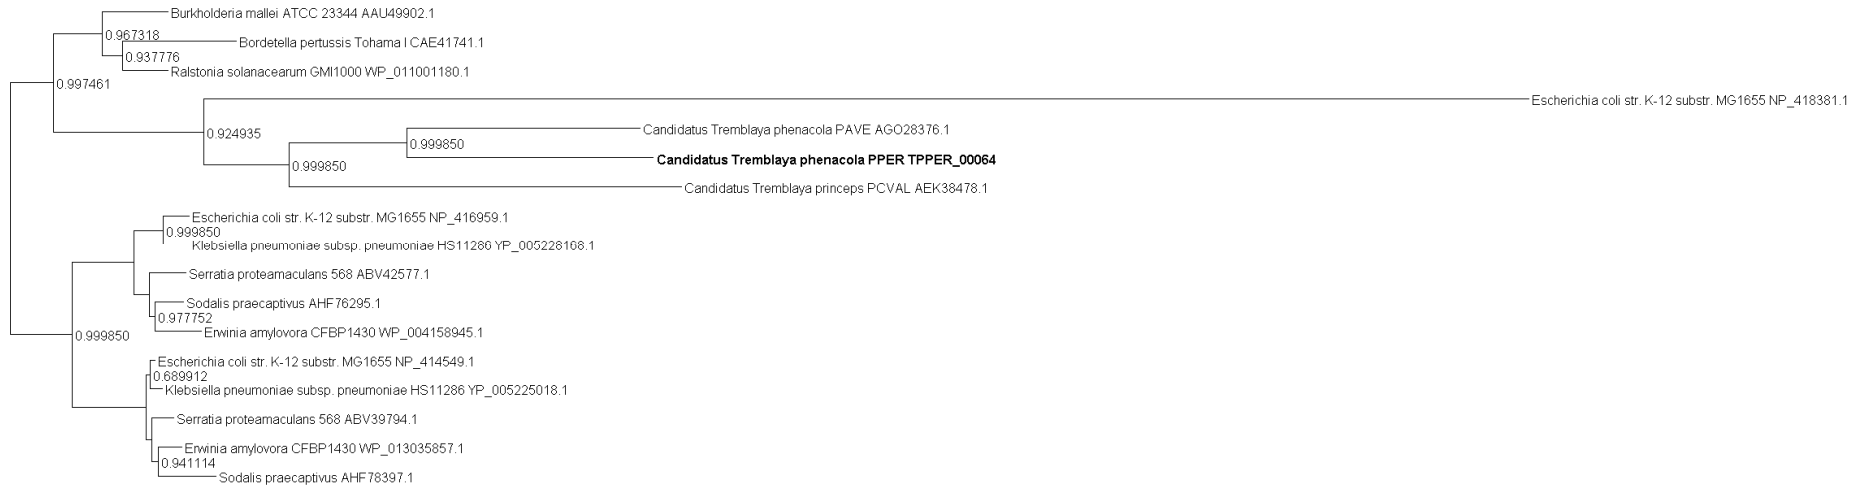

## frr (gamma)

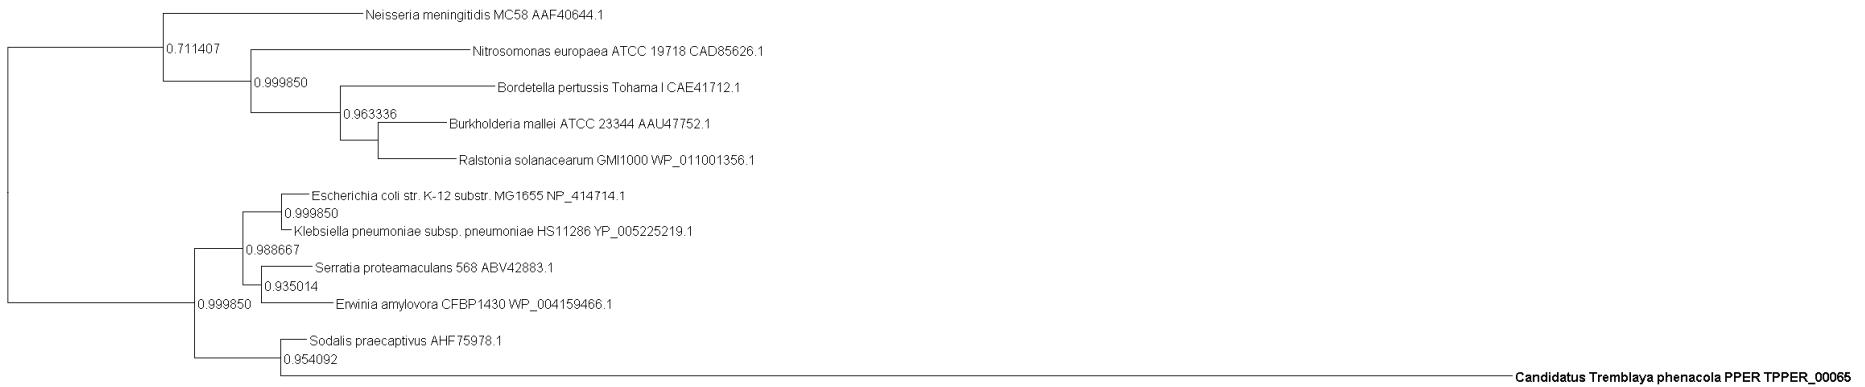

*dnaB* (gamma)

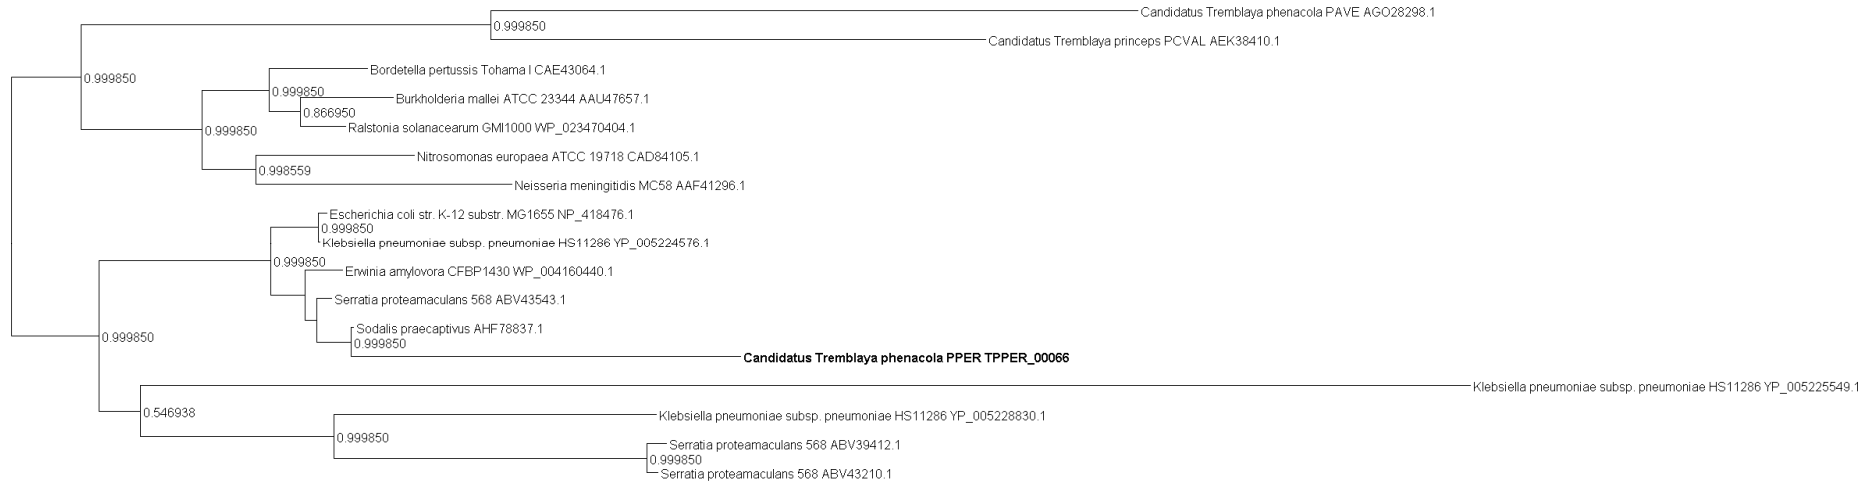

*rpmA* (beta only by Phylomizer)

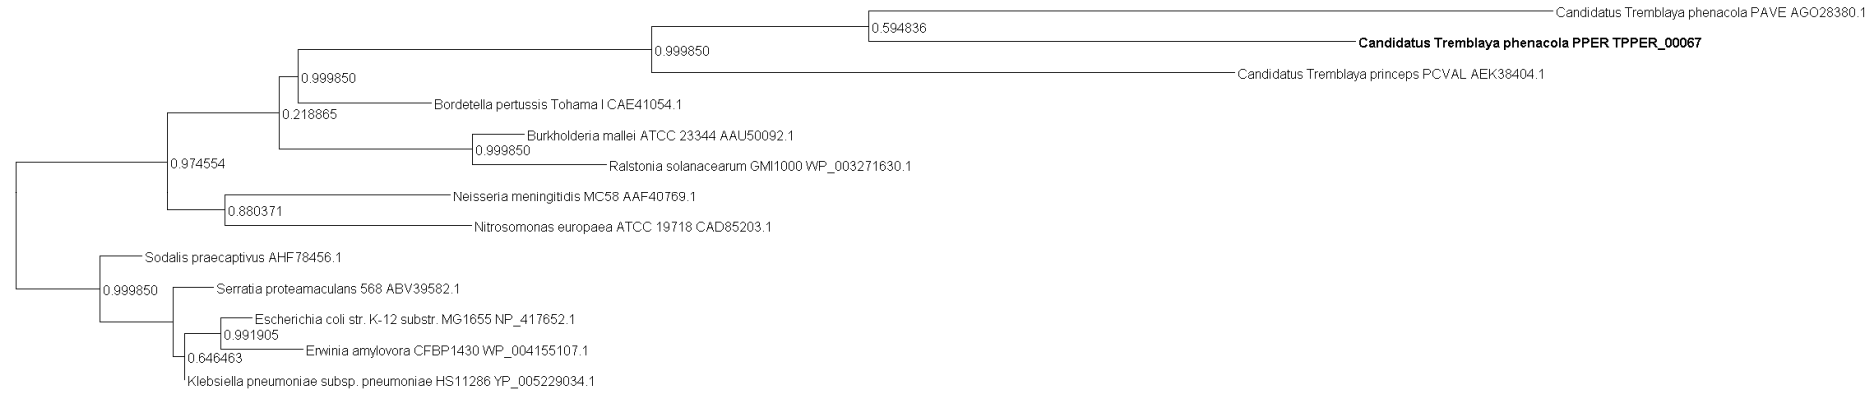



Figure S5.E. Contig 11

*prfB* (gamma)

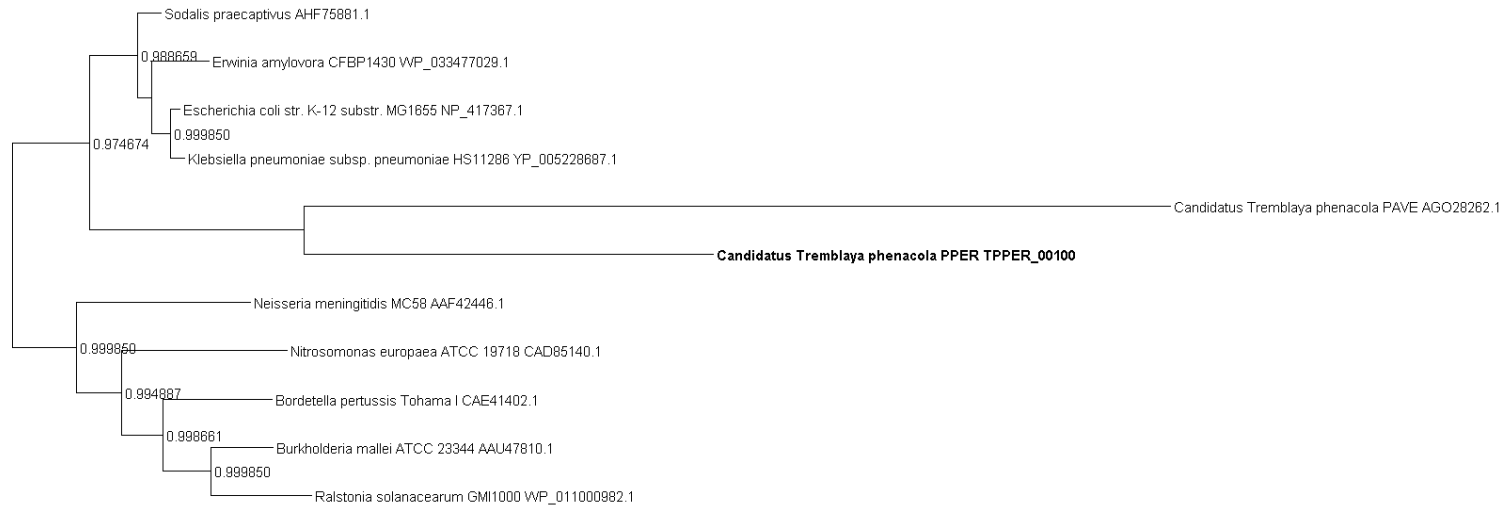

*rpmB* (beta only by Phylomizer)

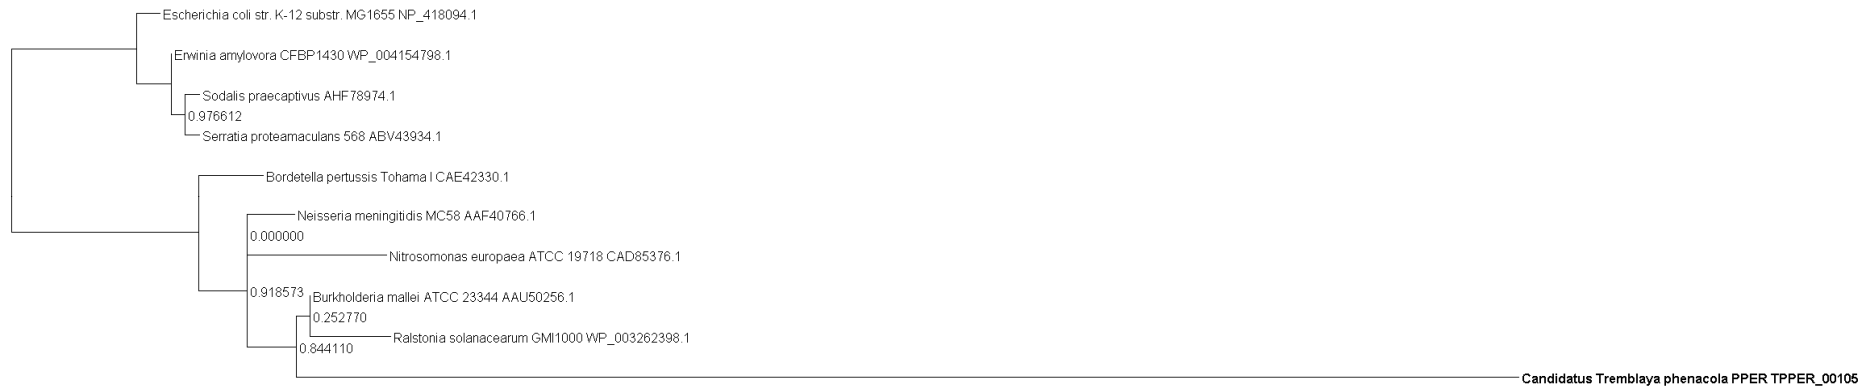

Figure S5.F. Contig 12

TPPER\_00116 (beta)

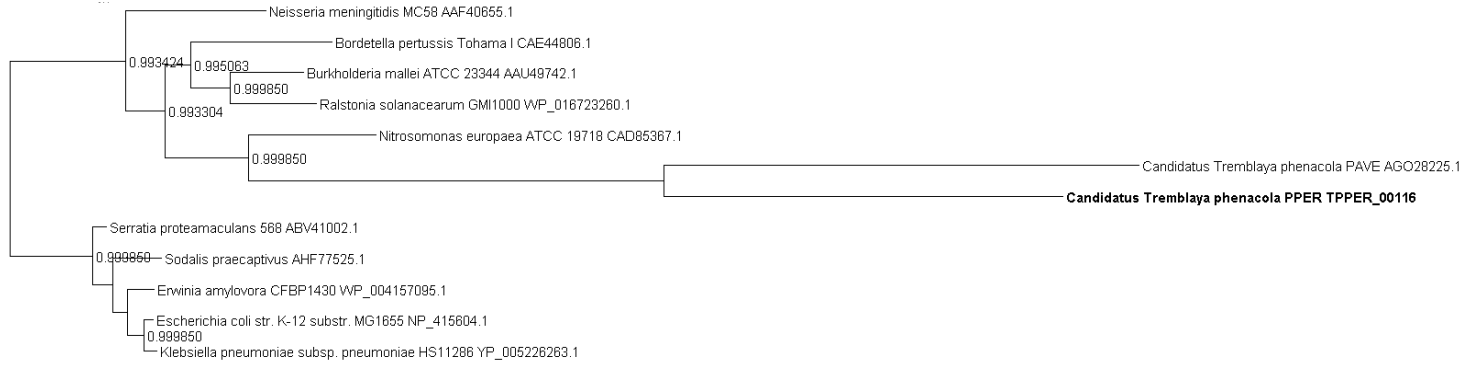

ligA (gamma)

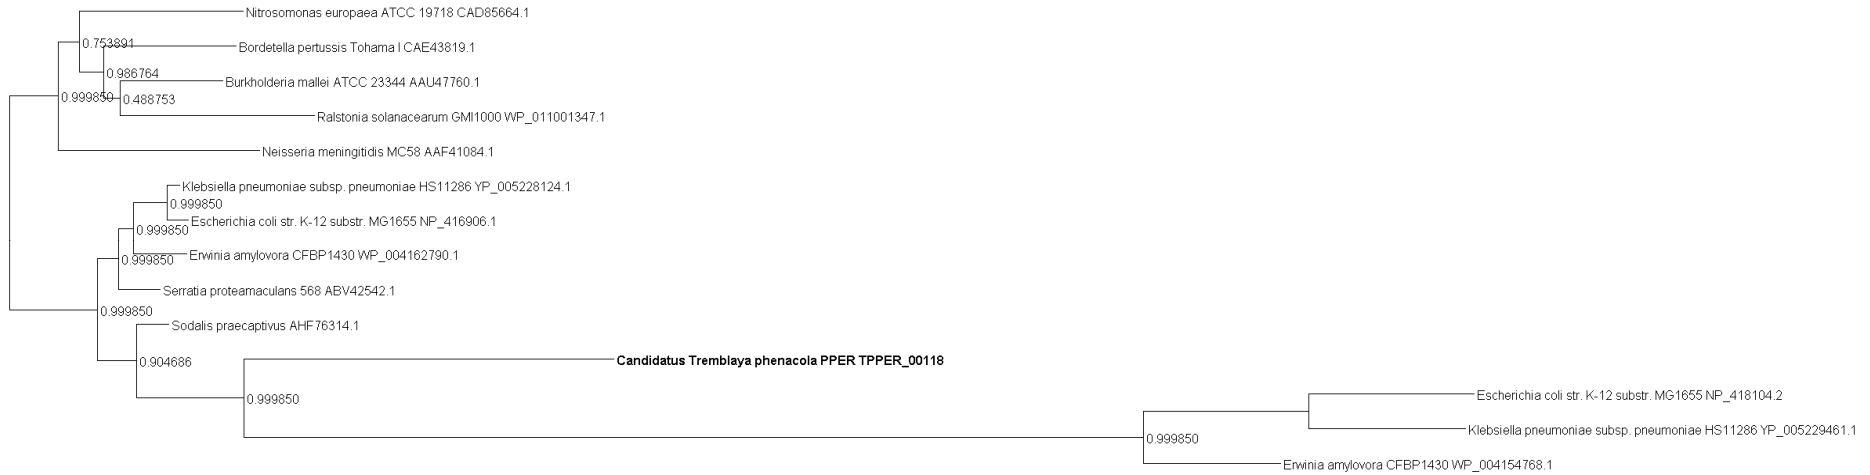

Supplement: ismej2017144x14.pdf [file ismej2017144x14.pdf]
