# Supplementary material
Source: PubMed Central journal article supplement (PMC5739004)
Supplement: ismej2017144x2.pdf [file ismej2017144x2.pdf]

**Table S1. Summary of the results obtained by binning of the first raw assembly using MyCC.** Clustering has been performed taken into consideration the coverage and the genomic signature of the contigs.

|                  | <b>Total Length</b> | <b>N50</b> | <b>Number of contigs</b> | <b>Number of reads</b> | <b>Percentage of total reads</b> | <b>Average Coverage</b> |
|------------------|---------------------|------------|--------------------------|------------------------|----------------------------------|-------------------------|
| <b>Cluster 1</b> | 213,66              | 10,332     | 33                       | 2,401,822              | 5.46%                            | 2,810.33                |
| <b>Cluster 2</b> | 180,548,803         | 26,802     | 14,789                   | 38,092,766             | 86.6%                            | 52.7                    |
| <b>Cluster 3</b> | 1,480,805           | 9,209      | 316                      | 481,203                | 1.09%                            | 81.2                    |
