# Supplementary material
Source: PubMed Central journal article supplement (PMC5739004)
Supplement: ismej2017144x3.pdf [file ismej2017144x3.pdf]

Table S2. Primers designed for testing the possible contig unions and polymorphic repeats.

| Contig | Position (5' - 3') | Primer     | sequence                 | length (nt) | Tm (°C)* |
|--------|--------------------|------------|--------------------------|-------------|----------|
| 1      | 949 - 928          | leuC_R1    | GAAGGCAGTAGACTTGTTTCTC   | 22          | 55.0     |
| 1      | 14021 - 14042      | leuS_F1    | CTAGCTATAACGTCCCTATTG    | 22          | 55.0     |
| 2      | 555 - 534          | dnaN_R2    | AAGGCAACAGTAAAAGCATTAT   | 22          | 55.1     |
| 2      | 13340 - 13361      | mnmG_F2    | CTGAAAACTAAACAAGCATCA    | 22          | 55.0     |
| 3      | 429 - 408          | rsmH_R3    | TATACATACGTTTCTGGGTCAC   | 22          | 54.3     |
| 3      | 4767 - 4786        | clpX_F3    | TCAGTACGACCACAAAATGA     | 20          | 55.2     |
| 4      | 590 - 571          | trxA_R4    | AAAGAGGGGAGTGTCTTAGG     | 20          | 55.0     |
| 4      | 6747 - 6767        | pheS_F4    | GCAGCTTATGAAGAAATAGCA    | 21          | 55.2     |
| 5      | 295 - 276          | clpP_R5    | CACGTATTAGCACAGCGTTA     | 20          | 55.2     |
| 5      | 4836 - 4857        | glyQ_F5    | GCTTTCCATATCTACCATCACT   | 22          | 55.0     |
| 6      | 768 - 747          | lpdA_R6    | CTTTAGATGGAACACAACCAAC   | 22          | 56.3     |
| 6      | 3567 - 3588        | aroQ_F6    | ATGCTAGTATGTGTGTGCCTG    | 22          | 55.3     |
| 7      | 333 - 312          | der_R7     | GCTCCAATGCCATATCTACTAT   | 22          | 55.2     |
| 7      | 12843 - 12864      | secA_F7    | CTCGTTGTATATTCTTTTAGCA   | 22          | 52.0     |
| 8      | 614 - 593          | ssrA_R8    | ACAAAAGCTAAAGAGAGGTTAG   | 22          | 52.0     |
| 8      | 9121 - 9142        | infC_F8    | TAAGATGCGTCAGTTAGTTAGC   | 22          | 54.3     |
| 9      | 339 - 318          | prfA_R9    | GCATATAGTAAAAGATGGTCTG   | 22          | 51.2     |
| 9      | 6362 - 6383        | groL_F9    | CTATGATGCAGCTAAGTCTCAA   | 22          | 55.1     |
| 9      | 6437 - 6456        | groL_F9b   | AGCTTTACAGTTTGCTGCTT     | 20          | 54.7     |
| 10     | 635 - 614          | ilvI_R10   | CTAAAACATGGGTTAGCTTAGG   | 22          | 55.1     |
| 10     | 6204 - 6223        | dapB_F10   | ATGGTGCCTTCGATAACTT      | 20          | 54.8     |
| 10     | 7566 - 7547        | hisG_R10   | ATGGCCTATATGAAGCAAAG     | 20          | 54.6     |
| 10     | 8612 - 8633        | prmC_F10   | TACCACTCCAGTTCCTAAGTC    | 22          | 55.2     |
| 11     | 274 - 251          | prfB_R11   | GTCTGTTACTATTAAGATTCAAGG | 24          | 51.4     |
| 11     | 4765 - 4786        | dapD_F11   | AGTTGGTAAAAGAGTCCACATC   | 22          | 55.0     |
| 12     | 705 - 684          | thrB_R12   | ACCAAATATTAAGCCTCTGAA    | 22          | 55.0     |
| 12     | 8455 - 8474        | P00109_F12 | TACCAAGCTGTCCTTTTCTT     | 20          | 54.3     |
| 12     | 9424 - 9405        | argF_R12   | TTGGGTGAAAGCTATCAGTT     | 20          | 55.0     |
| 12     | 13964 - 13985      | ileS_F12   | TGTATGTAGATGATGGGTTAGC   | 22          | 54.4     |
| 13     | 1852 - 1873        | gltX_F13   | AGAGCTCCAAGTATGTTTGACT   | 22          | 54.9     |
| 14     | 752 - 731          | hisS_R14   | ATCTAGCTCTGGTTCTTTGAGA   | 22          | 55.1     |
| 14     | 16705 - 16725      | cysGA_F14  | CTGGTCCAGGAAATAAAGACT    | 21          | 55.1     |
| 15     | 812 - 791          | iscU_R15   | TGAGTTAGTACAAGGGAAAACC   | 22          | 55.2     |
| 15     | 11916 - 11936      | thrC_F15   | GACTCACTGCAAGACATGATT    | 21          | 55.3     |
| 16     | 589 - 568          | argH_R16   | ACCATGCTTTTCGATAGAGTTAC  | 22          | 55.3     |
| 16     | 1567 - 1588        | argH_F16   | GCTACAGAATTGGCAGACTACT   | 22          | 55.5     |
| 17     | 1212 - 1191        | carB_R17   | TTAGAGGAGGTCTAGCAGTTGT   | 22          | 55.1     |
| 17     | 5879 - 5900        | dnaQ_F17   | GATTATTTGTGTGATAGGTTCA   | 22          | 52.0     |
| 18     | 1216 - 1195        | hisF_R18   | AGTAAAGGGGTTGAAGTTAGGT   | 22          | 55.3     |
| 18     | 3184 - 3205        | hisH_F18   | GTCACAGCTAACTATGGAGTCA   | 22          | 54.6     |
| 19     | 952 - 931          | aroB_R19   | GTTATCCATCTGTCGTTTACCT   | 22          | 55.0     |
| 19     | 28434 - 28455      | rlpK_F19   | CGTTAACATATTGAAAGAGCTA   | 22          | 52.0     |
| 20     | 531 - 510          | rrl_R20    | AGCTAACCAATACTAATGAACC   | 22          | 52.2     |
| 20     | 13906 - 13927      | metE_F20   | TCTCTTTGGTTTCTGAAGTTCT   | 22          | 55.0     |
| 21     | 868 - 847          | aspS_R21   | ACCTTAGTAAGAAAGAACAGGA   | 22          | 51.9     |
| 21     | 10071 - 10092      | lysS_F21   | TACCAGCAGTTGCTATGTTAAG   | 22          | 55.1     |
| 22     | 396 - 375          | pnp_R22    | GTTTACAGTTAATGGGAAGAGC   | 22          | 54.9     |
| 22     | 4020 - 4041        | tsaB_F22   | GATAGGGTAGAGGCTTCTAAGG   | 22          | 55.6     |

\*The melting temperature (Tm) indicated corresponds to that provided by Primer3Plus.
