# Supplementary material
Source: PubMed Central journal article supplement (PMC5739004)
Supplement: ismej2017144x4.pdf [file ismej2017144x4.pdf]

Table S3. Summary of the amplicons obtained using the different primer pair combinations.

| contigs                  | primer F   | primer R  | amplicon size | annealing T |
|--------------------------|------------|-----------|---------------|-------------|
| 15 - 3                   | thrC_F15   | rsmH_R3   | 542           | 55          |
| 15 - 22                  | thrC_F15   | pnp_R22   | 509           | 55          |
| 6c - 3                   | lpdA_R6    | rsmH_R3   | 953           | 55          |
| 6c - 22                  | lpdA_R6    | pnp_R22   | 1405          | 55          |
| 6 - 14                   | aroQ_F6    | hisS_R14  | 995           | 55          |
| 6 - 19                   | aroQ_F6    | aroB_R19  | 1195          | 55          |
| 6 - 1                    | aroQ_F6    | leuC_R1   | 1192          | 55          |
| 22 - 14                  | tsaB_F22   | hisS_R14  | 1021          | 55          |
| 22 - 19                  | tsaB_F22   | aroB_R19  | 1221          | 54          |
| 22 - 1                   | tsaB_F22   | leuC_R1   | 1218          | 55          |
| 9 - 14                   | groL_F9b   | hisS_R14  | 880           | 54          |
| 9 - 14                   | groL_F9    | hisS_R14b | 886           | 55          |
| 9 - 19                   | groL_F9    | aroB_R19  | 1155          | 55          |
| 9 - 1                    | groL_F9    | leuC_R1   | 1152          | 55          |
| 8 - 16                   | infC_F8    | argH_R16  | 1368          | 55          |
| 8 - 18                   | infC_F8    | hisF_R18  | 1997          | 55          |
| 8 - (13) - 10            | infC_F8    | ilvI_R10  | 3505          | 53          |
| 8 - (13) - 12c           | infC_F8    | ileS_R12  | 3613          | 53          |
| 14 - 16                  | cysGA_F14  | argH_R16  | 1515          | 55          |
| 14 - (16) - 7            | cysGA_F14  | der_R7    | 2694          | 53          |
| 14 - (16 - 23) - 4       | cysGA_F14  | trxA_R4   | 4471          | 54          |
| 14 - (16 - 23) - 5       | cysGA_F14  | clpP_R5   | 3135          | 54          |
| 14 - 18                  | cysGA_F14  | hisF_R18  | 1514          | 55          |
| 14 - (13) - 10           | cysGA_F14  | ilvI_R10  | 3022          | 53          |
| 14 - (13) - 12c          | cysGA_F14  | ileS_R12  | 3504          | 53          |
| 3 - 7                    | clpX-F3    | der_R7    | 510           | 54          |
| 3 - (23) - 4             | clpX-F3    | trxA_R4   | 3287          | 52          |
| 3 - (23) - 5             | clpX-F3    | clpP_R5   | 1992          | 52          |
| 16 - (23) - 4            | argH_F16   | trxA_R4   | 2607          | 53          |
| 16 - (23) - 5            | argH_F16   | clpP_R5   | 2312          | 53          |
| 11 - 4                   | dapD_F11   | trxA_R4   | 932           | 54          |
| 11 - 5                   | dapD_F11   | clpP_R5   | 637           | 54          |
| 18 (contig confirmation) | hisH_F18   | hisG_R10  | 1408          | 54          |
| 10 (contig confirmation) | dapB_F10   | hisG_R10  | 1363          | 55          |
| 10/18 - 9                | prmC_F10   | prfA_R9   | 854           | 55          |
| 10/18 - 11               | prmC_F10   | prfB_R11  | 789           | 55          |
| 18 - 9                   | hisH_F18   | prfA_R9   | 3286          | 53          |
| 18 - 11                  | hisH_F18   | prfB_R11  | 3219          |             |
| 10 - 9                   | dapB_F10   | prfA_R9   | 3241          | 55          |
| 10 - 11                  | dapB_F10   | prfB_R11  | 3174          | 55          |
| 13 - 10                  | gltX_F13   | ilvI_R10  | 837           | 55          |
| 13 - 12c                 | gltX_F13   | ileS_R12  | 981           | 55          |
| 5 - 10                   | glyQ_F5    | ilvI_R10  | 877           | 55          |
| 5 - 12c                  | glyQ_F5    | ileS_R12  | 985           | 55          |
| 21 - 9                   | lysS_F21   | prfA_R9   | 900           | 55          |
| 21 - 11                  | lysS_F21   | prfB_R11  | 833           | 55          |
| 8c - 20                  | ssrA_R8    | rrl_R20   | 957           | 53          |
| 8c - 17c                 | ssrA_R8    | dnaQ_F17  | 1044          | 53          |
| 8c - 21                  | ssrA_R8    | aspS_R21  | 1262          | 53          |
| 7 - 20                   | secA_F7    | rrl_R20   | 597           | 53          |
| 7 - 17c                  | secA_F7    | dnaQ_F17  | 684           | 53          |
| 7 - 21                   | secA_F7    | aspS_R21  | 902           | 53          |
| 19 - 20                  | rlpK_F19   | rrl_R20   | 695           | 53          |
| 19-17c                   | rlpK_F19   | dnaQ_F17  | 782           | 53          |
| 19-21                    | rlpK_F19   | aspS_R21  | 1000          | 53          |
| 4 - 15                   | pheS_F4    | iscU_R15  | 931           | 54          |
| 4 - 2                    | pheS_F4    | dnaN_R2   | 674           | 54          |
| 20 - 15                  | metE_F20   | iscU_R15  | 888           | 54          |
| 20 - 2                   | metE_F20   | dnaN_R2   | 631           | 54          |
| 2 - 12                   | mnmg_F2    | thrB_R12  | 1464          | 54          |
| 2 - 17                   | mnmg_F2    | carB_R17  | 1971          | 54          |
| 1 - 12                   | leuS_F1    | thrB_R12  | 1011          | 54          |
| 1 - 17                   | leuS_F1    | carB_R17  | 1518          | 54          |
| 12 (length polymorphism) | P00109_F12 | argF_R12  | ~1000         | 52          |
