# Supplementary material
Source: PubMed Central journal article supplement (PMC5739004)
Supplement: ismej2017144x5.pdf [file ismej2017144x5.pdf]

Table S4 Genomes used in this study

| Class                         | Bacterial species              | strain              | Host                      | Acc. Number                             |
|-------------------------------|--------------------------------|---------------------|---------------------------|-----------------------------------------|
| Betaproteobacteria            | <i>Tremblaya princeps</i>      | PCVAL               | Planococcus citri         | CP002918.1                              |
|                               | <i>Tremblaya phenacola</i>     | PAVE                | Phenacoccus avenae        | CP003982.1 and CP003983.1               |
|                               |                                | PPER                | Phenacoccus peruvianus    | MKGN00000000*                           |
|                               | <i>Bordetella pertussis</i>    | Tohama I            | –                         | BX470248.1                              |
|                               | <i>Burkholderia mallei</i>     | ATCC 23344          | –                         | CP000010.1 and CP000011.2               |
|                               | <i>Neisseria meningitidis</i>  | MC58                | –                         | AE002098.2                              |
|                               | <i>Nitrosomonas europaea</i>   | ATCC 19718          | –                         | AL954747.1                              |
| <i>Ralstonia solanacearum</i> | GMI1000                        | –                   | AL646052.1 and AL646053.1 |                                         |
| Gammaproteobacteria           | <i>Erwinia amylovora</i>       | CFBP1430            | –                         | FN434113.1 and FN434114.1               |
|                               | <i>Escherichia coli</i>        | K-12 substr. MG1655 | –                         | U00096.3                                |
|                               | <i>Klebsiella pneumoniae</i>   | HS11286             | –                         | CP003200.1 and CP003223.1 to CP003228.1 |
|                               | <i>Serratia proteamaculans</i> | 568                 | –                         | CP000826.1 and CP000827.1               |
|                               | <i>Sodalis praecaptivus</i>    |                     | –                         | CP006569.1 and CP006570.1               |
|                               | <i>Doolittlea endobia</i>      | MHIR                | Maconellicoccus hirsutus  | LN999833.1                              |
|                               | <i>Gullanella endobia</i>      | FVIR                | Ferrisia virgata          | LN999832.1                              |
|                               | <i>Mikella endobia</i>         | PMAR                | Paracoccus marginatus     | LN999831.1                              |
| <i>Hoaglandella endobia</i>   | TPER                           | Trionymus perrisii  | LN999835.1                |                                         |
| Alphaproteobacteria           | <i>Bartonella quintana</i>     | RM-11               | –                         | CP003784.1                              |
|                               | <i>Rickettsia prowazekii</i>   | Madrid E            | –                         | AJ235269.1                              |

\*This Whole Genome Shotgun project has been deposited at DDBJ/ENA/GenBank under the accession MKGN00000000.

The version described in this paper is version MKGN01000000.
