# Supplementary material
Source: PubMed Central journal article supplement (PMC5739004)
Supplement: ismej2017144x6.pdf [file ismej2017144x6.pdf]

| 5' contig | middle contig | 3' contig | counts | 5' contig size | middle contig size with repeats | 3' contig size | full fragment size |
|-----------|---------------|-----------|--------|----------------|---------------------------------|----------------|--------------------|
| F06       | F01           | F12       | 1      | 3565           | 14880                           | 13668          | 32113              |
| F09       | F01           | F12       | 1      | 6428           | 14880                           | 13668          | 34976              |
| F22       | F01           | F12       | 2      | 4003           | 14880                           | 13668          | 32551              |
| F06       | F01           | F17       | 2      | 3565           | 14880                           | 13668          | 24120              |
| F09       | F01           | F17       | 1      | 6428           | 14880                           | 5675           | 26983              |
| F22       | F01           | F17       | 1      | 4003           | 14880                           | 5675           | 24558              |
| F04       | F02           | F12       | 2      | 6581           | 14652                           | 13668          | 34901              |
| F20       | F02           | F12       | 1      | 13682          | 14652                           | 13668          | 42002              |
| F04       | F02           | F17       | 2      | 6581           | 14652                           | 5675           | 26908              |
| F20       | F02           | F17       | 1      | 13682          | 14652                           | 5675           | 34009              |
| R06       | F03           | F07       | 14     | 3565           | 5137                            | 12667          | 21369              |
| F15       | F03           | F07       | 5      | 11752          | 5137                            | 12667          | 29556              |
| R06       | F03           | F23       | 7      | 3565           | 5137                            | 1327           | 10029              |
| F15       | F03           | F23       | 6      | 11752          | 5137                            | 1327           | 18216              |
| F11       | F04           | F02       | 4      | 5011           | 7141                            | 13822          | 25974              |
| F23       | F04           | F02       | 7      | 1327           | 7141                            | 13822          | 22290              |
| F11       | F04           | F15       | 5      | 5011           | 7141                            | 11752          | 23904              |
| F23       | F04           | F15       | 6      | 1327           | 7141                            | 11752          | 20220              |
| F11       | F05           | F10       | 9      | 5011           | 5562                            | 6252           | 16825              |
| F23       | F05           | F10       | 3      | 1327           | 5562                            | 6252           | 13141              |
| F11       | F05           | R12       | 9      | 5011           | 5562                            | 13668          | 24241              |
| F23       | F05           | R12       | 6      | 1327           | 5562                            | 13668          | 20557              |
| R03       | F06           | F01       | 5      | 4719           | 4152                            | 13581          | 22452              |
| R22       | F06           | F01       | 6      | 4003           | 4152                            | 13581          | 21736              |
| R03       | F06           | F14       | 8      | 4719           | 4152                            | 16660          | 25531              |
| R22       | F06           | F14       | 6      | 4003           | 4152                            | 16660          | 24815              |
| R03       | F06           | F19       | 5      | 4719           | 4152                            | 27805          | 36676              |
| R22       | F06           | F19       | 4      | 4003           | 4152                            | 27805          | 35960              |
| F03       | F07           | R17       | 1      | 4719           | 13128                           | 5675           | 23522              |
| F16       | F07           | R17       | 1      | 1538           | 13128                           | 5675           | 20341              |
| F03       | F07           | F20       | 3      | 4719           | 13128                           | 13682          | 31529              |
| F16       | F07           | F20       | 1      | 1538           | 13128                           | 13682          | 28348              |
| F03       | F07           | F21       | 2      | 4719           | 13128                           | 10404          | 28351              |
| F16       | F07           | F21       | 1      | 1538           | 13128                           | 10404          | 25070              |
| F17       | F08           | F13       | 2      | 5675           | 10425                           | 1706           | 17806              |
| R20       | F08           | F13       | 1      | 13682          | 10425                           | 1706           | 25813              |
| R21       | F08           | F13       | 1      | 10404          | 10425                           | 1706           | 22535              |
| F17       | F08           | F16       | 1      | 5675           | 10425                           | 1538           | 17638              |
| R20       | F08           | F16       | 1      | 13682          | 10425                           | 1538           | 25645              |
| R21       | F08           | F16       | 1      | 10404          | 10425                           | 1538           | 22367              |
| F17       | F08           | F18       | 1      | 5675           | 10425                           | 2786           | 18886              |
| R20       | F08           | F18       | 1      | 13682          | 10425                           | 2786           | 26893              |
| R21       | F08           | F18       | 1      | 10404          | 10425                           | 2786           | 23615              |
| F10       | F09           | F01       | 2      | 6252           | 6907                            | 13581          | 26740              |
| F18       | F09           | F01       | 2      | 2786           | 6907                            | 13581          | 23274              |
| F21       | F09           | F01       | 2      | 10404          | 6907                            | 13581          | 30892              |
| F10       | F09           | F14       | 5      | 6252           | 6907                            | 16660          | 29819              |
| F18       | F09           | F14       | 1      | 2786           | 6907                            | 16660          | 26353              |
| F21       | F09           | F14       | 4      | 10404          | 6907                            | 16660          | 33971              |
| F10       | F09           | F19       | 4      | 6252           | 6907                            | 27805          | 40964              |
| F18       | F09           | F19       | 1      | 2786           | 6907                            | 27805          | 37498              |
| F21       | F09           | F19       | 3      | 10404          | 6907                            | 27805          | 45116              |
| F05       | F10           | F09       | 4      | 4794           | 9221                            | 6428           | 20443              |
| F13       | F10           | F09       | 4      | 1706           | 9221                            | 6428           | 17355              |
| F05       | F10           | F11       | 6      | 4794           | 9221                            | 5011           | 19026              |
| F13       | F10           | F11       | 2      | 1706           | 9221                            | 5011           | 15938              |
| F10       | F11           | F04       | 3      | 6252           | 5390                            | 6581           | 18223              |
| F18       | F11           | F04       | 1      | 2786           | 5390                            | 6581           | 14757              |
| F21       | F11           | F04       | 4      | 10404          | 5390                            | 6581           | 22375              |
| F10       | F11           | F05       | 2      | 6252           | 5390                            | 4794           | 16436              |
| F18       | F11           | F05       | 2      | 2786           | 5390                            | 4794           | 12970              |
| F21       | F11           | F05       | 7      | 10404          | 5390                            | 4794           | 20588              |
| F01       | F12           | R05       | 4      | 13581          | 14706                           | 4794           | 33081              |
| F02       | F12           | R05       | 1      | 13822          | 14706                           | 4794           | 33322              |
| F01       | F12           | R13       | 1      | 13581          | 14706                           | 1706           | 29993              |
| F02       | F12           | R13       | 1      | 13822          | 14706                           | 1706           | 30234              |
| F08       | F13           | F10       | 5      | 9681           | 2573                            | 6252           | 18506              |
| F14       | F13           | F10       | 16     | 16660          | 2573                            | 6252           | 25485              |
| F08       | F13           | R12       | 6      | 9681           | 2573                            | 13668          | 25922              |
| F14       | F13           | R12       | 10     | 16660          | 2573                            | 13668          | 32901              |
| F06       | F14           | F13       | 2      | 3565           | 17527                           | 1706           | 22798              |
| F09       | F14           | F13       | 1      | 6428           | 17527                           | 1706           | 25661              |
| F22       | F14           | F13       | 1      | 4003           | 17527                           | 1706           | 23236              |
| F06       | F14           | F16       | 1      | 3565           | 17527                           | 1538           | 22630              |
| F09       | F14           | F16       | 1      | 6428           | 17527                           | 1538           | 25493              |
| F22       | F14           | F16       | 1      | 4003           | 17527                           | 1538           | 23068              |
| F06       | F14           | F18       | 2      | 3565           | 17527                           | 2786           | 23878              |
| F09       | F14           | F18       | 1      | 6428           | 17527                           | 2786           | 26741              |
| F22       | F14           | F18       | 1      | 4003           | 17527                           | 2786           | 24316              |
| F04       | F15           | F03       | 4      | 6581           | 12272                           | 4719           | 23572              |
| F20       | F15           | F03       | 1      | 13682          | 12272                           | 4719           | 30673              |
| F04       | F15           | F22       | 3      | 6581           | 12272                           | 4003           | 22856              |
| F20       | F15           | F22       | 5      | 13682          | 12272                           | 4003           | 29957              |
| F08       | F16           | F07       | 4      | 9681           | 2256                            | 12667          | 24604              |
| F14       | F16           | F07       | 7      | 16660          | 2256                            | 12667          | 31583              |
| F08       | F16           | F23       | 10     | 9681           | 2256                            | 1327           | 13264              |
| F14       | F16           | F23       | 6      | 16660          | 2256                            | 1327           | 20243              |
| F01       | F17           | R07       | 2      | 13581          | 6528                            | 12667          | 32776              |
| F17       | F17           | R07       | 4      | 13822          | 6528                            | 12667          | 33017              |
| F01       | F17           | F08       | 5      | 13581          | 6528                            | 9681           | 29790              |
| F02       | F17           | F08       | 2      | 13822          | 6528                            | 9681           | 30031              |
| F01       | F17           | R19       | 4      | 13581          | 6528                            | 27805          | 47914              |
| F02       | F17           | R19       | 2      | 13822          | 6528                            | 27805          | 48155              |
| F08       | F18           | F09       | 1      | 9681           | 6246                            | 6428           | 22355              |
| F14       | F18           | F09       | 2      | 16660          | 6246                            | 6428           | 29334              |
| F08       | F18           | F11       | 2      | 9681           | 6246                            | 5011           | 20938              |
| F14       | F18           | F11       | 4      | 16660          | 6246                            | 5011           | 27917              |
| F06       | F19           | R17       | 1      | 3565           | 28817                           | 5675           | 38857              |
| F09       | F19           | R17       | 1      | 6428           | 28817                           | 5675           | 40920              |
| F22       | F19           | R17       | 1      | 4003           | 28817                           | 5675           | 38495              |
| F06       | F19           | F20       | 3565   | 28817          | 13682                           | 46064          | 46064              |
| F09       | F19           | F20       | 6428   | 28817          | 13682                           | 48927          | 48927              |
| F22       | F19           | F20       | 4003   | 28817          | 13682                           | 46502          | 46502              |
| F06       | F19           | F21       | 1      | 3565           | 28817                           | 10404          | 42786              |
| F09       | F19           | F21       | 1      | 6428           | 28817                           | 10404          | 45649              |
| F22       | F19           | F21       | 1      | 4003           | 28817                           | 10404          | 43224              |
| R07       | F20           | F02       | 1      | 12667          | 14257                           | 13822          | 40746              |
| R08       | F20           | F02       | 1      | 9681           | 14257                           | 13822          | 37760              |
| F19       | F20           | F02       | 27805  | 14257          | 14257                           | 13822          | 55884              |
| F07       | F20           | F15       | 2      | 12667          | 14257                           | 11752          | 38676              |
| R08       | F20           | F15       | 2      | 9681           | 14257                           | 11752          | 35690              |
| F19       | F20           | F15       | 2      | 27805          | 14257                           | 11752          | 53814              |
| F07       | F21           | F09       | 1      | 12667          | 10719                           | 6428           | 29814              |
| R08       | F21           | F09       | 1      | 9681           | 10719                           | 6428           | 26828              |
| F19       | F21           | F09       | 1      | 27805          | 10719                           | 6428           | 44952              |
| F07       | F21           | F11       | 2      | 12667          | 10719                           | 5011           | 28397              |
| R08       | F21           | F11       | 1      | 9681           | 10719                           | 5011           | 25411              |
| F19       | F21           | F11       | 2      | 27805          | 10719                           | 5011           | 43535              |
| R06       | F22           | F01       | 7      | 3565           | 4631                            | 13581          | 21777              |
| F15       | F22           | F01       | 5      | 11752          | 4631                            | 13581          | 29964              |
| R06       | F22           | F14       | 4      | 3565           | 4631                            | 16660          | 24856              |
| F15       | F22           | F14       | 7      | 11752          | 4631                            | 16660          | 33043              |
| R06       | F22           | F19       | 4      | 3565           | 4631                            | 27805          | 36001              |
| F15       | F22           | F19       | 6      | 11752          | 4631                            | 27805          | 44188              |
| F03       | F23           | F04       | 16     | 4719           | 1805                            | 6581           | 13105              |
| F16       | F23           | F04       | 13     | 1538           | 1805                            | 6581           | 9924               |
| F03       | F23           | F05       | 9      | 4719           | 1805                            | 4794           | 11318              |
| F16       | F23           | F05       | 6      | 1538           | 1805                            | 4794           | 8137               |

**Table S5. Counts for the observed possible combinations of three contigs.** All the possible neighbors on both the 5' and 3' end of each contig were identified from the paired-end data. Using the information from the Nanopore reads, we counted the number of times each combination appeared.

An F before the contig number indicates that the contigs could be linked to its neighbors without any modification. When the reverse complement had to be calculated for the contigs to be linked, the contig number is preceded by an R.
