# Supplementary material
Source: PubMed Central journal article supplement (PMC5739004)
Supplement: ismej2017144x8.pdf [file ismej2017144x8.pdf]

Table S7. Differences in protein-coding genes between *T. phenacola* PPER and PAVE.  
The beta or gamma origin of the PPER genes is indicated by background color (blue and orange, respectively).

| Function                                   | gene name         | PPER                | PAVE                                  | Product                                                   | COG | Presence in <i>T. princeps</i> (TP) genomes (Husnik et al., 2016) |
|--------------------------------------------|-------------------|---------------------|---------------------------------------|-----------------------------------------------------------|-----|-------------------------------------------------------------------|
| DNA metabolism                             | ligA              | PROKKA_00108        |                                       | DNA ligase                                                | L   | 0                                                                 |
|                                            | dnaN              | PROKKA_00085        |                                       | DNA polymerase III subunit beta                           | L   | All                                                               |
|                                            | dnaX              |                     | TPPAVE_135                            | DNA polymerase III subunit tau                            | L   | All                                                               |
|                                            | ssb               |                     | TPPAVE_136                            | Single-stranded DNA-binding protein                       | L   | present in most TP, pseudogenized in TPPLON and TPPCIT            |
| Translation                                | alaS              | PROKKA_00212        |                                       | Alanine--tRNA ligase                                      | J   | 0                                                                 |
|                                            | glyS              | PROKKA_00009        |                                       | Glycine--tRNA ligase beta subunit                         | J   | 0                                                                 |
|                                            | lysS              | PROKKA_00022        |                                       | Lysine--tRNA ligase                                       | J   | 0                                                                 |
|                                            | map               | PROKKA_00002        |                                       | Methionine aminopeptidase                                 | J   | 0                                                                 |
|                                            | mnmE              | PROKKA_00077        |                                       | tRNA modification GTPase MnmE                             | J   | absent (TPMAR) or pseudogenized                                   |
|                                            | obg               | PROKKA_00044        |                                       | GTPase Obg                                                | J   | 0                                                                 |
|                                            | pnp               | PROKKA_00150        |                                       | Polyribonucleotide nucleotidyltransferase                 | J   | 0                                                                 |
|                                            | rluD              | PROKKA_00056        |                                       | Ribosomal large subunit pseudouridine synthase D          | J   | 0                                                                 |
|                                            | rplI              | PROKKA_00147        |                                       | 50S ribosomal protein L9                                  | J   | All                                                               |
|                                            | rpmH              | PROKKA_00084.1      |                                       | 50S ribosomal protein L34                                 | J   | All                                                               |
|                                            | trpS              | PROKKA_00082        |                                       | Tryptophan--tRNA ligase                                   | J   | 0                                                                 |
|                                            | tsaB              | PROKKA_00154        |                                       | tRNA threonylcarbamoyladenosine biosynthesis protein TsaB | J   | only in PCVAL (that does not have tsaD)                           |
|                                            | tyrS              | PROKKA_00067        |                                       | Tyrosine--tRNA ligase                                     | J   | 0                                                                 |
|                                            | ybeY              | PROKKA_00046        |                                       | Endoribonuclease YbeY                                     | J   | 0                                                                 |
|                                            | gatA              |                     | TPPAVE_193                            | glutamyl-tRNA(Gln) amidotransferase, A subunit            | J   | All                                                               |
|                                            | gatB              |                     | TPPAVE_192                            | glutamyl-tRNA(Gln) amidotransferase, B subunit            | J   | All                                                               |
|                                            | miaA              |                     | TPPAVE_025                            | tRNA dimethylallyltransferase                             | J   | 0                                                                 |
|                                            | mnmA              |                     | TPPAVE_030                            | tRNA-specific 2-thiouridylase MnmA                        | J   | absent or pseudogenized (TPFVIR, TPPLON, TPPCIT, TPTPER)          |
|                                            | rsmA              |                     | TPPAVE_205                            | Ribosomal RNA small subunit methyltransferase A           | J   | 0                                                                 |
| thrS                                       |                   | TPPAVE_103          | Threonine--tRNA ligase                | J                                                         | 0   |                                                                   |
| Protein processing, folding, and secretion | lepB              | PROKKA_00197        |                                       | Signal peptidase I                                        | N   | 0                                                                 |
|                                            | lon               | PROKKA_00049        |                                       | Lon protease                                              | O   | 0                                                                 |
|                                            | secA              | PROKKA_00034        |                                       | Protein translocase subunit SecA                          | N   | 0                                                                 |
|                                            | secY              | PROKKA_00163        |                                       | Protein translocase subunit SecY                          | N   | 0                                                                 |
| Carbohydrate metabolism                    | acnA              | PROKKA_00106        |                                       | Aconitate hydratase A                                     | C   | 0                                                                 |
|                                            | lpdA              | PROKKA_00051        |                                       | Dihydrolipoyl dehydrogenase                               | C   | All pseudogenized                                                 |
|                                            | pykF <sup>1</sup> | PROKKA_00070        |                                       | Pyruvate kinase I                                         | G   | 0                                                                 |
| Biosynthesis of nucleotides                | cmk               |                     | TPPAVE_049                            | Cytidylate kinase                                         | F   | 0                                                                 |
|                                            | ndk <sup>1</sup>  |                     | TPPAVE_134                            | Nucleoside diphosphate kinase                             | F   | present in most TP, pseudogenized in TPPCIT, absent in TPMHIR     |
|                                            | prs               |                     | TPPAVE_199                            | Ribose-phosphate pyrophosphokinase                        | F   | All                                                               |
| Biosynthesis of amino acids                | cysE              | PROKKA_00023        |                                       | Serine acetyltransferase                                  | E   | 0                                                                 |
|                                            | cysH              | PROKKA_00027        |                                       | Phosphoadenosine phosphosulfate reductase                 | E   | 0                                                                 |
|                                            | cysK              | PROKKA_00112        |                                       | Cysteine synthase A                                       | E   | 0                                                                 |
|                                            | hom <sup>2</sup>  | PROKKA_00148        |                                       | Homoserine dehydrogenase                                  | E   | 0                                                                 |
|                                            | ilvI <sup>3</sup> | PROKKA_00006        |                                       | Acetolactate synthase isozyme 3 large subunit             | E   | 0                                                                 |
|                                            | aroE              |                     | TPPAVE_125                            | Shikimate dehydrogenase (NADP(+))                         | E   | 0                                                                 |
|                                            | ilvB <sup>3</sup> |                     | TPPAVE_060                            | Acetolactate synthase isozyme 1 large subunit             | E   | All                                                               |
|                                            | thrA <sup>2</sup> |                     | TPPAVE_113                            | Bifunctional aspartokinase/homoserine dehydrogenase 1     | E   | All                                                               |
| trpF                                       |                   | TPPAVE_005          | Tryptophan biosynthesis protein TrpCF | E                                                         | 0   |                                                                   |
| Sulfure metabolism                         | cysI              | PROKKA_00028        |                                       | Sulfite reductase [NADPH] hemoprotein beta-component      | P   | 0                                                                 |
|                                            | cysJ              | PROKKA_00029        |                                       | Sulfite reductase [NADPH] flavoprotein alpha-component    | P   | 0                                                                 |
| Coenzyme metabolism                        | cysG              | PROKKA_00073 and 74 |                                       | Siroheme synthase                                         | H   | 0                                                                 |
|                                            | lipA              | PROKKA_00137        |                                       | Lipoyl synthase                                           | H   | 0                                                                 |
|                                            | panB              | PROKKA_00213        |                                       | 3-methyl-2-oxobutanoate hydroxymethyltransferase          | H   | 0                                                                 |
| Energy metabolism                          | trxA              | PROKKA_00080        |                                       | Thioredoxin-1                                             | O   | 0                                                                 |
|                                            | ahpC              |                     | TPPAVE_124                            | Alkyl hydroperoxide reductase subunit C                   | O   | 0                                                                 |
