# Supplementary material
Source: PubMed Central journal article supplement (PMC5739004)
Supplement: ismej2017144x9.pdf [file ismej2017144x9.pdf]

Table S8. Summary of genes that gave no clear affiliation to betaproteobacteria in the genomes of *T. princeps* PCVAL, *T. phenacola* PAVE and genes from *T. phenacola* PPER that could not be clearly assigned to any taxonomical level.

| Organism                                  | Function                                  | Gene name   | GenBank ID  | MEGAN               | Phylogeny           | Taxonomic class     | Product                                                          | size (aa)                 |     |
|-------------------------------------------|-------------------------------------------|-------------|-------------|---------------------|---------------------|---------------------|------------------------------------------------------------------|---------------------------|-----|
| <b>T. princeps PCVAL</b>                  | Translation                               | rpsQ        | AEK38455.1  | Betaproteobacteria  | Gammaproteobacteria | Unknown             | 30S ribosomal protein S17                                        | 76                        |     |
|                                           |                                           | rpsU        | AFU55744.1  | Proteobacteria      | Unknown             | Unknown             | 30S ribosomal protein S21                                        | 63                        |     |
|                                           | Protein processing, folding and secretion | clpP        | AEK38487.1  | Proteobacteria      | Gammaproteobacteria | Gammaproteobacteria | ATP-dependent Clp protease proteolytic subunit precursor         | 196                       |     |
|                                           | Biosynthesis of amino acids               | argG        | AEK38488.1  | Betaproteobacteria  | Gammaproteobacteria | Unknown             | Argininosuccinate synthase                                       | 436                       |     |
|                                           | Metabolism                                | pflA        | AEK38430.1  | Betaproteobacteria  | Gammaproteobacteria | Unknown             | putative radical SAM enzyme, Cfr family                          | 304                       |     |
| <b>T. phenacola PAVE</b>                  | DNA replication                           | dnaX        | AGO28316.1  | Betaproteobacteria  | Gammaproteobacteria | Unknown             | DNA polymerase III subunit tau                                   | 369                       |     |
|                                           | Translation                               | mnmG        | AGO28233.1  | Betaproteobacteria  | Gammaproteobacteria | Unknown             | tRNA uridine 5-carboxymethylaminomethyl modification enzyme MnmG | 592                       |     |
|                                           |                                           | prfB        | AGO28262.1  | Betaproteobacteria  | Gammaproteobacteria | Unknown             | Peptide chain release factor 2                                   | 330                       |     |
|                                           |                                           | rplO        | AGO28335.1  | Betaproteobacteria  | Gammaproteobacteria | Unknown             | 50S ribosomal protein L15                                        | 124                       |     |
|                                           |                                           | rpmG        | AGO28265.1  | Proteobacteria      | Gammaproteobacteria | Gammaproteobacteria | 50S ribosomal protein L33                                        | 54                        |     |
|                                           |                                           | rsmH        | AGO28258.1  | Betaproteobacteria  | Gammaproteobacteria | Unknown             | Ribosomal RNA small subunit methyltransferase H                  | 295                       |     |
|                                           |                                           | tsaD        | AGO28216.1  | Betaproteobacteria  | Gammaproteobacteria | Unknown             | tRNA N6-adenosine threonylcarbamoyltransferase                   | 336                       |     |
|                                           | Biosynthesis of amino acids               | argG        | AGO28220.1  | Betaproteobacteria  | Gammaproteobacteria | Unknown             | Argininosuccinate synthase                                       | 439                       |     |
|                                           |                                           | hisI        | AGO28319.1  | Betaproteobacteria  | Gammaproteobacteria | Unknown             | Histidine biosynthesis bifunctional protein HisIE                | 120                       |     |
|                                           | <b>T. phenacola PPER</b>                  | Translation | rbfA        | TPPER_00154         | Unknown             | Unknown             | Unknown                                                          | Ribosome-binding factor A | 102 |
| rnpA                                      |                                           |             | TPPER_00163 | Unknown             | Unknown             | Unknown             | Ribonuclease P protein component                                 | 63                        |     |
| rplI                                      |                                           |             | TPPER_00159 | Alphaproteobacteria | Betaproteobacteria  | Unknown             | 50S ribosomal protein L9                                         | 135                       |     |
| rplJ                                      |                                           |             | TPPER_00217 | Proteobacteria      | Unknown             | Unknown             | 50S ribosomal protein L10                                        | 162                       |     |
| rpsD                                      |                                           |             | TPPER_00186 | Gammaproteobacteria | Betaproteobacteria  | Unknown             | 30S ribosomal protein S4                                         | 205                       |     |
| rpsJ                                      |                                           |             | TPPER_00209 | Alphaproteobacteria | Betaproteobacteria  | Unknown             | 30S ribosomal protein S10                                        | 109                       |     |
| rpsO                                      |                                           |             | TPPER_00093 | Bacteria            | Unknown             | Unknown             | 30S ribosomal protein S15                                        | 86                        |     |
| rsfS                                      |                                           |             | TPPER_00007 | Bacteria            | Unknown             | Unknown             | Ribosomal silencing factor RsfS                                  | 117                       |     |
| serS                                      |                                           |             | TPPER_00047 | Burkholderia        | Gammaproteobacteria | Unknown             | Serine-tRNA ligase                                               | 418                       |     |
| Protein processing, folding and secretion |                                           |             | lepB        | TPPER_00011         | Vibrionaceae        | Betaproteobacteria  | Unknown                                                          | Signal peptidase I        | 183 |
|                                           |                                           | iscA        | TPPER_00150 | Bacteria            | Unknown             | Unknown             | Iron-sulfur cluster insertion protein IscA                       | 107                       |     |
| Unknown                                   |                                           |             | TPPER_00169 | TPPER_00169         | Unknown             | Unknown             | Unknown                                                          | hypothetical protein      | 91  |
|                                           |                                           |             | TPPER_00206 | TPPER_00206         | Unknown             | Unknown             | Unknown                                                          | hypothetical protein      | 97  |
