# Supplementary material
Source: PubMed Central journal article supplement (PMC5739004)
Supplement: ismej2017144x13.pdf [file ismej2017144x13.pdf]

Figure S4. Codon Usage

beta-genes in PPER

gamma-genes in PPER

PPER

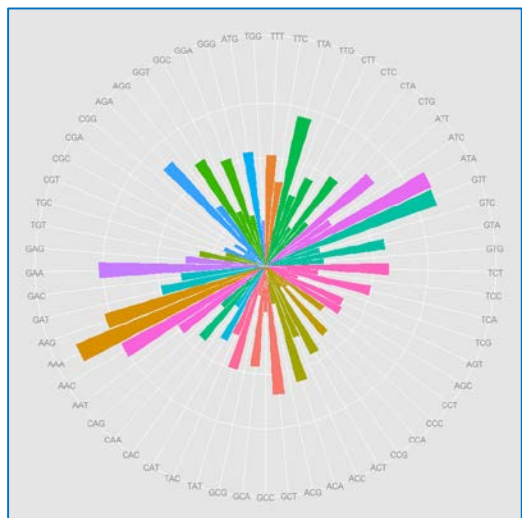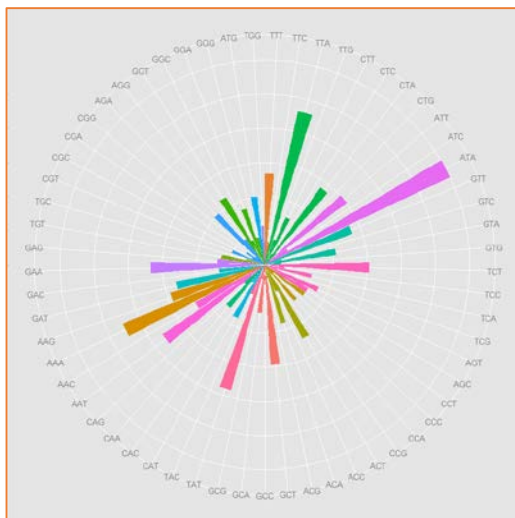

PAVE

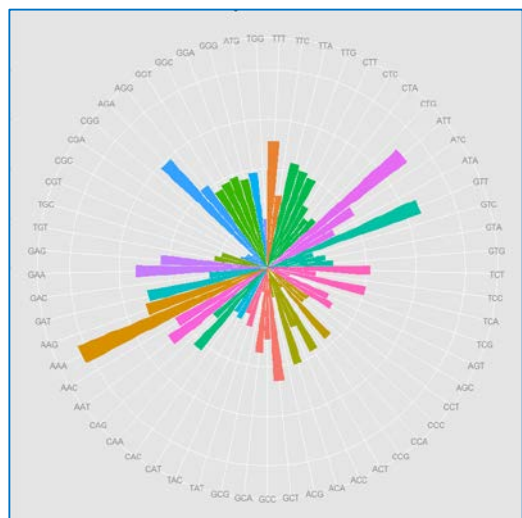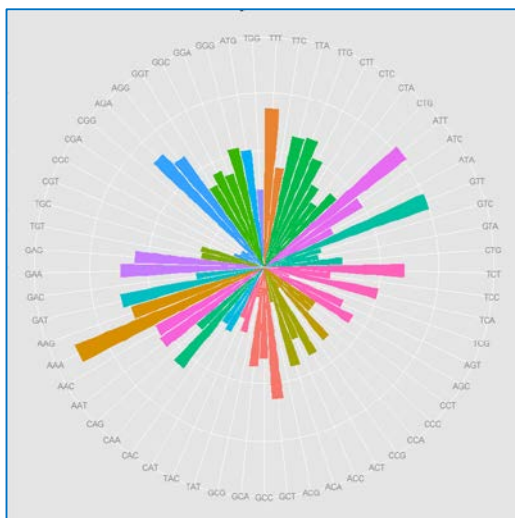

PCVAL

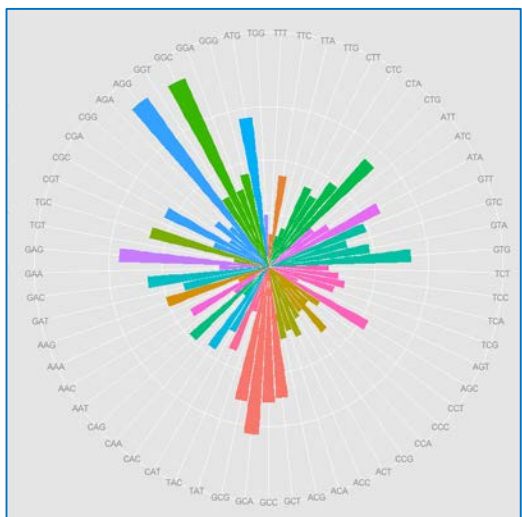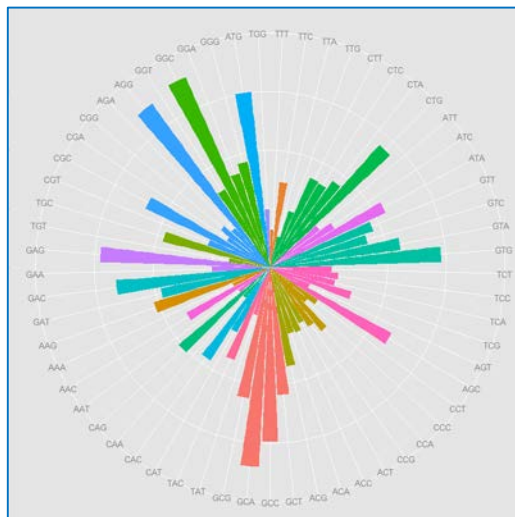

amino acid

- A
- C
- D
- E
- F
- G
- H
- I
- K
- L
- M
- N
- P
- Q
- R
- S
- T
- V
- W
- Y
