# Supplementary material
Source: PubMed Central journal article supplement (PMC5739004)

Figure S6. *T. phenacola* PPER in the tree of life

1.0

Tremblaya phenacola PPER -  $\gamma$

Tremblaya phenacola PPER -  $\beta$

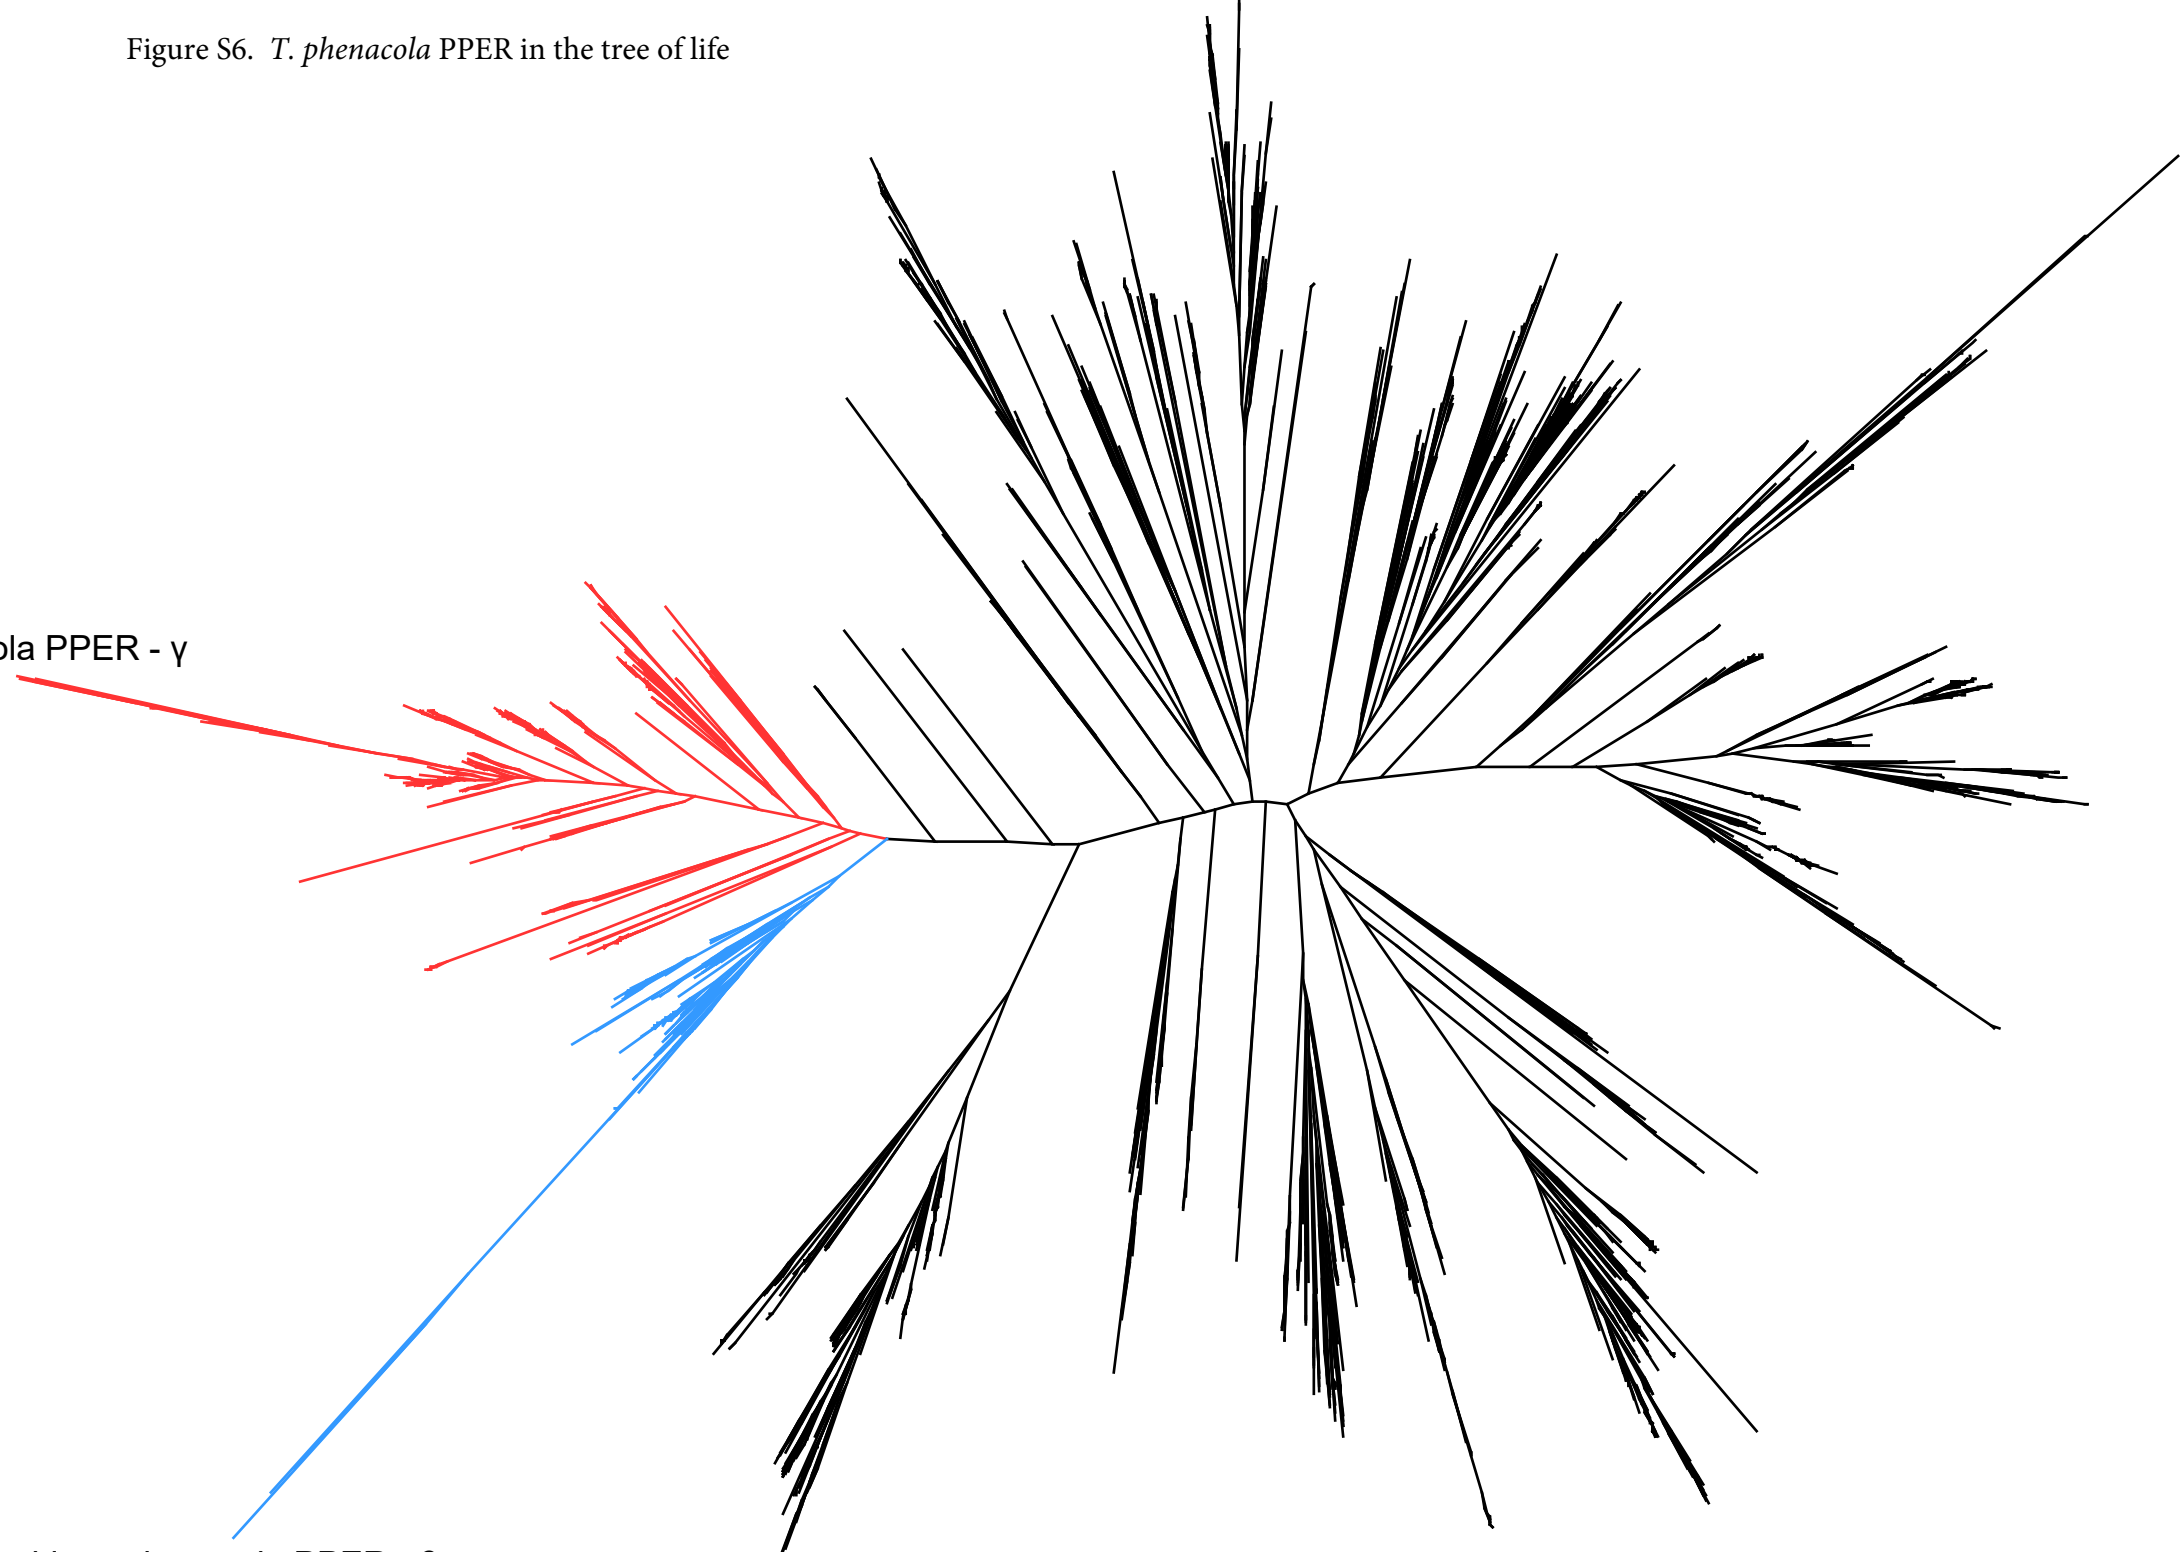

Supplement: ismej2017144x15.pdf [file ismej2017144x15.pdf]
