# Supplementary material
Source: PubMed Central journal article supplement (PMC5739004)

Figure S1

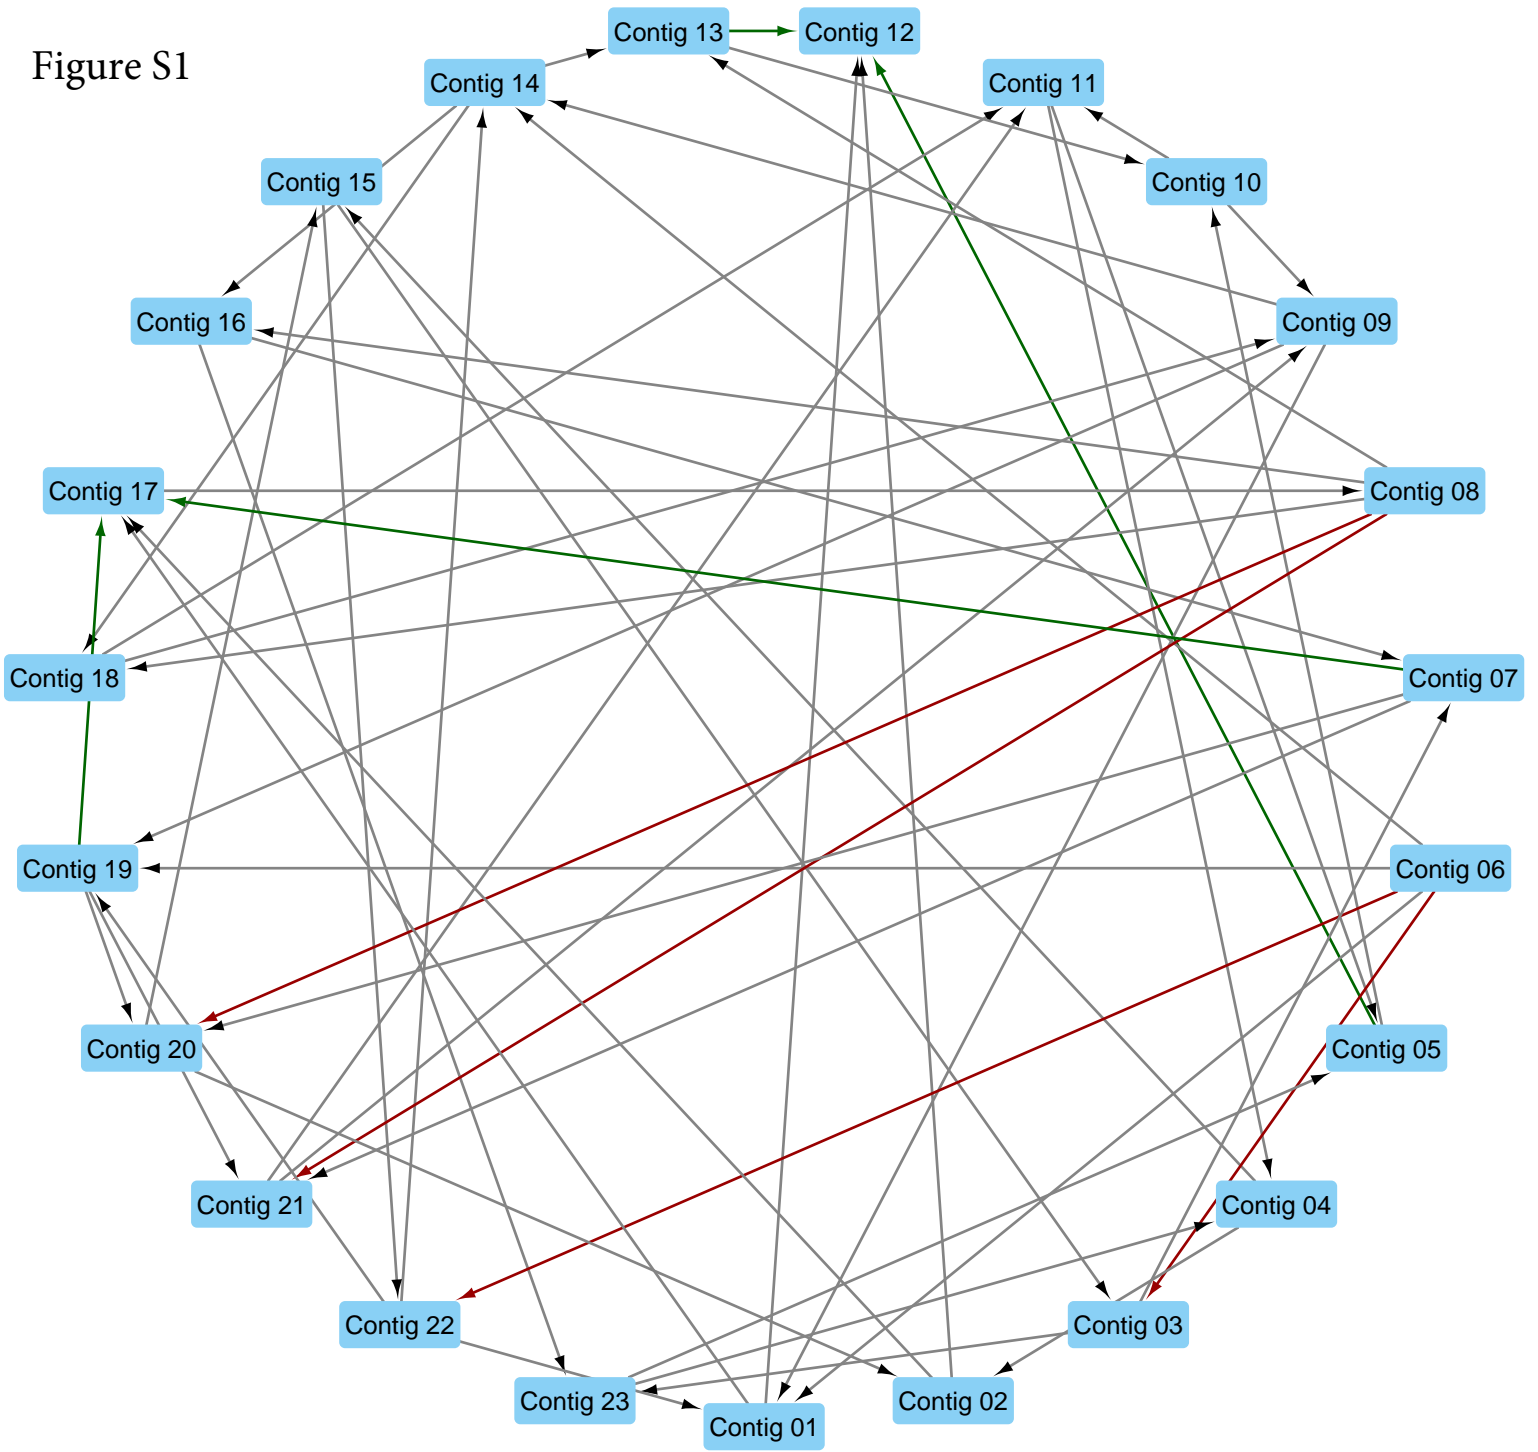

Supplement: ismej2017144x10.pdf [file ismej2017144x10.pdf]

Figure S2

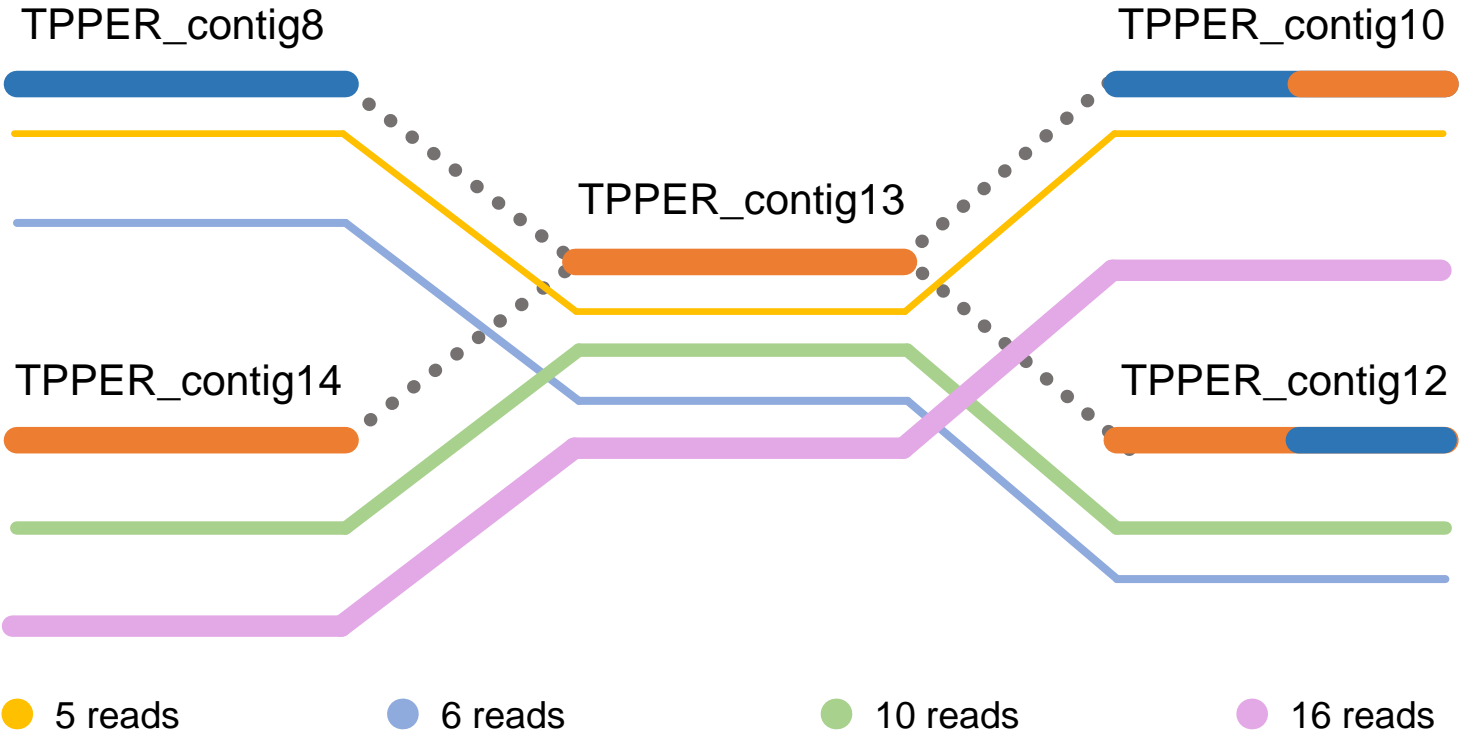

Supplement: ismej2017144x11.pdf [file ismej2017144x11.pdf]

Figure S3

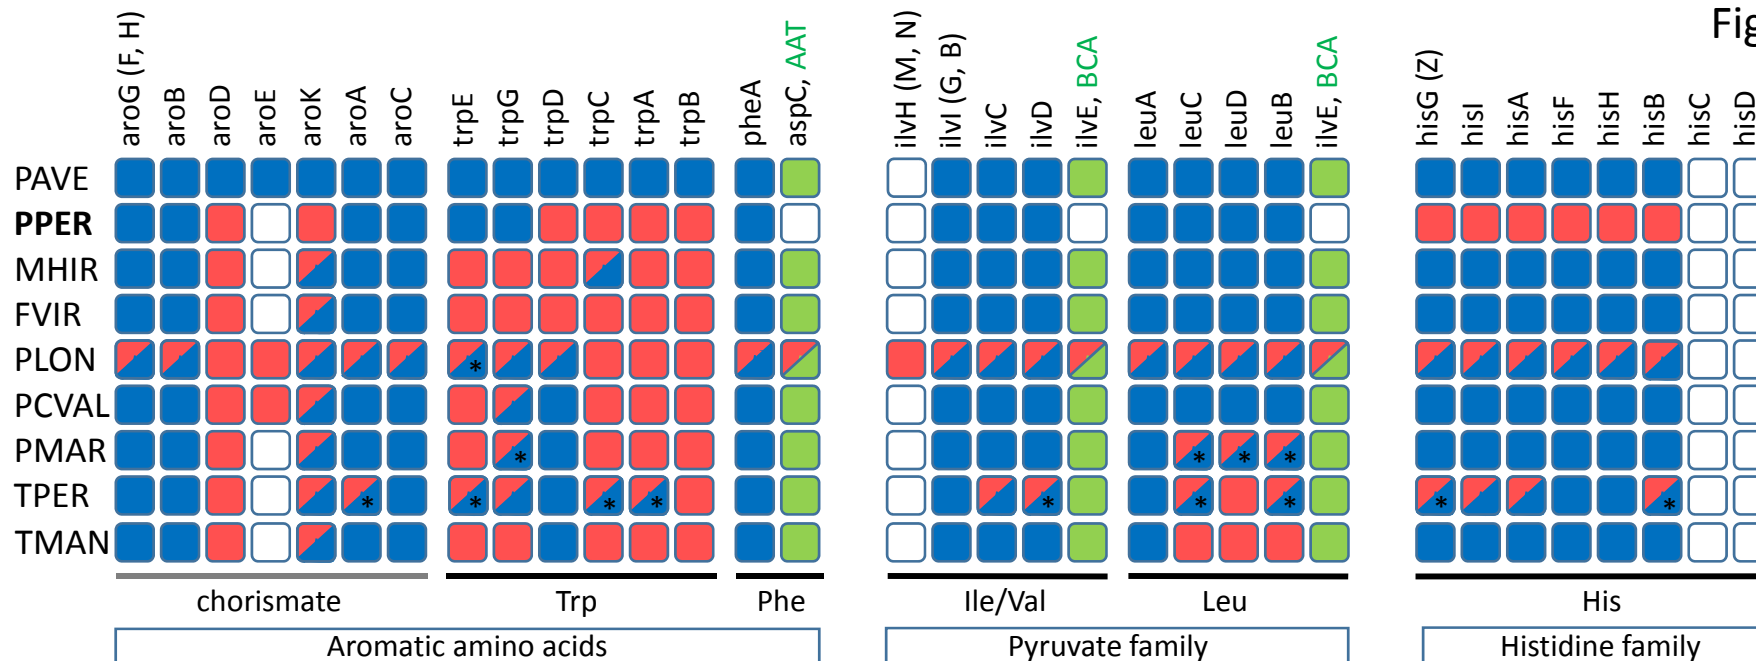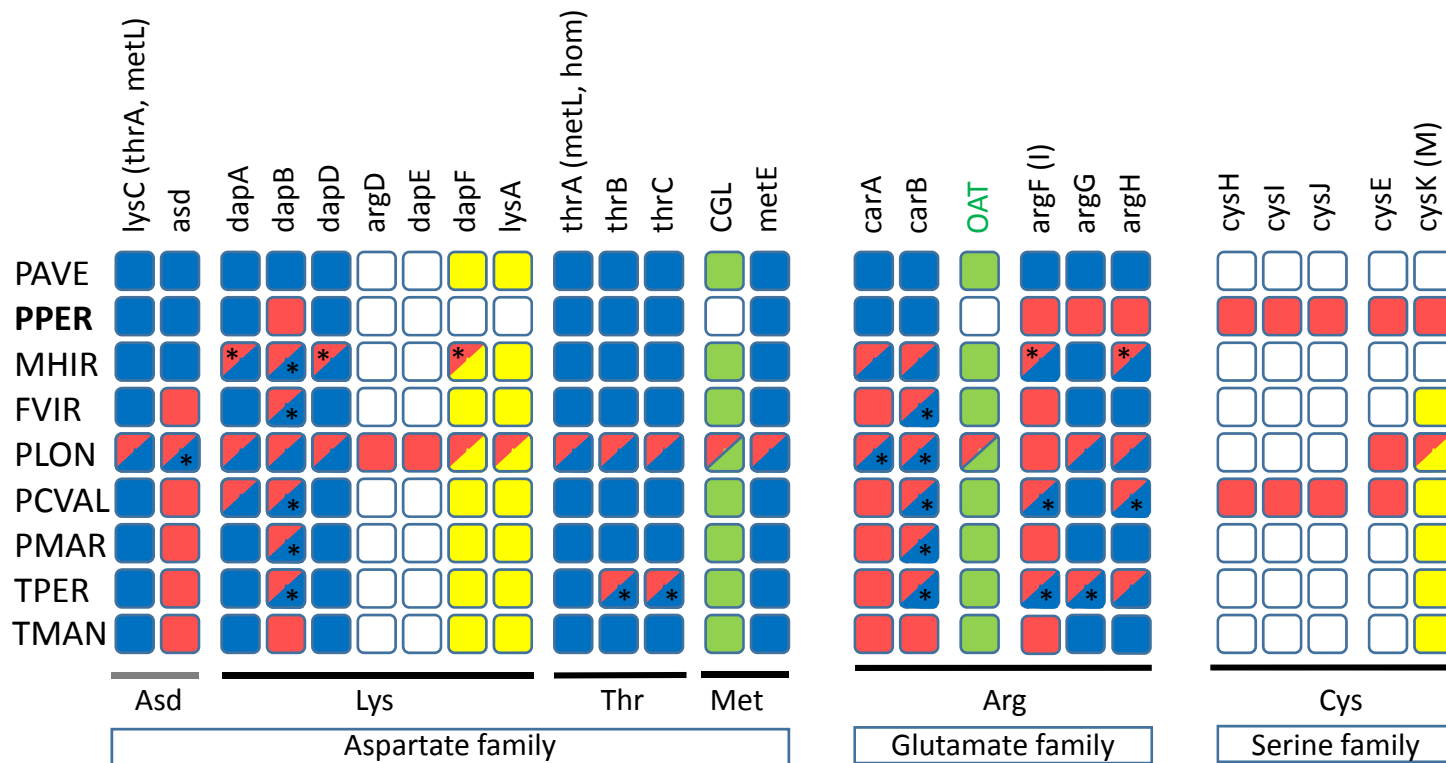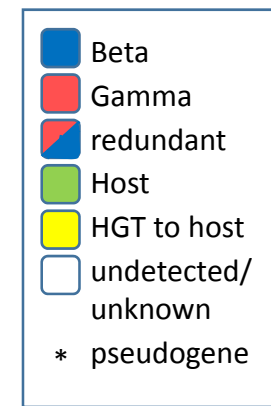

Supplement: ismej2017144x12.pdf [file ismej2017144x12.pdf]
